# Supplementary material for: The synthesis and biological evaluation of virtually designed fluoroquinolone analogs against fluoroquinolone-resistantEscherichia coliintended for UTI treatment
Source: Royal Society of Chemistry journal article supplement (doi:10.1039/d0nj00657b), 2020-01-01
Supplement: d0nj00657b1.pdf [file d0nj00657b1.pdf]

### Electronic Supplementary Information

#### Synthesis and biological evaluation of virtually designed fluoroquinolone analogs against fluoroquinolone-resistant *Escherichia coli* intended for UTI

Sakthivel Balasubramanian<sup>a</sup>, Navabshah Irfan<sup>b</sup>, Chinnaiyan Senthilkumar<sup>c</sup>, Appavoo Umamaheswary<sup>a</sup>, Ayarivan Puratchikody<sup>a</sup>,

<sup>a</sup>Drug Discovery and Development Research Group, Department of Pharmaceutical Technology, University College of Engineering, Anna University, BIT Campus, Tiruchirapalli-620024, Tamilnadu, India.

<sup>b</sup>School of Pharmacy, B.S. Abdur Rahman Crescent Institute of Science & Technology, Chennai-600048. Tamilnadu. India.

<sup>c</sup>Central Leather Research Institute-CSIR, Chennai- 600020. Tamilnadu. India.

\*Corresponding author: Ayarivan Puratchikody, Email: puratchipharma@gmail.com.

#### Synthesis of ethyl 6-fluoro-7-nitro-4-oxo-1,4-dihydroquinoline-3-carboxylate (1a) (Gould–Jacobs reaction).

Spectral data: <sup>1</sup>H NMR (400 MHz, DMSO-d<sub>6</sub>, ppm): δ 13.21 (1H), 8.51 (1H, s.), 7.94 (1H, d, J = 0.5 Hz), 6.56 (1H, s.), 6.49 (1H, s.), 4.86 (2H, q), 1.11 (3H, t, J = 7.1 Hz). <sup>13</sup>C NMR (100 MHz DMSO-d<sub>6</sub>): 175.2, 164.9, 154.9, 149.8, 141.1, 133.3, 121.8, 114.0, 111.0, 106.6, 106.3, 103.6, 60.1, 16.3. MS (ESI) m/z (% of relative abundance) calculated for [C<sub>12</sub>H<sub>9</sub>FN<sub>2</sub>O<sub>5</sub>]<sup>+</sup> 280.211, Found 281.65 (M+1). Elemental analysis calculated C (51.44%), H (3.24%), N (10.2%), Found C (50.45%), H (3.56%), N (9.68%).

#### Synthesis of ethyl 7-amino-6-fluoro-4-oxo-1,4-dihydro quinoline-3-carboxylate (1b) (Reduction process).

Spectral data: <sup>1</sup>H NMR (400 MHz, DMSO-d<sub>6</sub>, ppm): δ 13.21 (1H, s), 8.52 (1H, s), 7.98 (1H, d, J = 0.5 Hz), 6.58 (1H, s), 6.41 (1H, s), 4.85 (2H, q), 3.31 (2H, s), 1.15 (3H, t, J = 7.1 Hz). <sup>13</sup>C NMR (100 MHz DMSO-d<sub>6</sub>): 175.2, 164.9, 154.8, 149.8, 141.1, 133.3, 121.8, 114.1, 106.6, 106.3, 103.6, 60.1, 16.3. MS (ESI) m/z (% of relative abundance) calculated for [C<sub>12</sub>H<sub>11</sub>FN<sub>2</sub>O<sub>3</sub>]<sup>+</sup> 250.22, Found 251.40 (M+1). Elemental analysis calculated C (57.60%), H (4.43%), N (11.2%), Found C (56.47%), H (3.97%), N (10.81%).

#### Synthesis of 7-amino-6-fluoro-4-oxo-1,4-dihydroquinoline-3-carboxylic acid (1c) (Hydrolysis).

Spectral data: <sup>1</sup>H NMR (400 MHz, DMSO-d<sub>6</sub>, ppm): δ 15.25 (1H, s), 13.22 (1H, s), 8.58 (1H, s), 7.93 (1H, d, J = 0.5 Hz), 6.52 (1H, d, J = 0.5 Hz), 3.33 (2H, s). <sup>13</sup>C NMR (100 MHz DMSO-d<sub>6</sub>): 175.2, 164.9, 154.9, 149.8, 141.1, 121.8, 114.2, 111.1, 106.6, 106.3, 103.6. MS (ESI) m/z (% of relative abundance) calculated for [C<sub>10</sub>H<sub>7</sub>FN<sub>2</sub>O<sub>3</sub>]<sup>+</sup> 222.17. Found 223.69. Elemental analysis calculated C (54.06%), H (3.18%), N (12.61%), Found C (53.10%), H (2.91%), N (11.23%).

#### General procedure of synthesis of 7-(3-chloro-2-oxoazetidin-1-yl)-6-fluoro-4-oxo-1,4-dihydroquinoline-3-carboxylic acid derivatives (2a and 2b) (substitution reaction).

Spectral data (FQ-49): <sup>1</sup>H NMR (400 MHz, DMSO-d<sub>6</sub>, ppm): δ 14.63 (1H, s), 13.16 (1H, s), 8.69 (1H, s), 7.94 (1H, s), 7.34 (2H, ddd, J = 8.8), 7.22 (2H, ddd, J = 8.8), 6.89 (1H, s), 5.64 (1H, d, J = 5.5 Hz), 5.35 (1H, d, J = 5.5 Hz), 3.91-4.01 (2H, t, J = 7.4 Hz), 1.23-1.84 (6H, m), 0.86 (3H, t). <sup>13</sup>C NMR (100 MHz DMSO-d<sub>6</sub>): 173.1, 167.8, 166.6, 160.5, 152.6, 149.2, 141.3, 139.6, 137.6, 125.6, 122.2, 114.2, 111.8, 106.3, 103.6, 69.0, 59.7, 58.1, 31.0, 29.2, 25.4, 22.1, 13.8. MS (ESI) m/z (% of relative abundance) calculated for [C<sub>25</sub>H<sub>24</sub>ClFN<sub>2</sub>O<sub>5</sub>]<sup>+</sup> 486.92: found 487.84 (M+1). Elemental analysis: C (61.67%), H (4.97%), N (5.75%). Found C (61.66%), H (4.96%), N (5.72%).

Spectral (FQ-70): <sup>1</sup>H NMR (400 MHz, DMSO-d<sub>6</sub>, ppm): δ 15.33 (1H, s), 13.26 (1H, s), 8.66 (1H, s), 7.94 (1H, s), 7.36 (2H, ddd, J = 8.8), 7.12 (2H, ddd, J = 8.8), 6.89 (1H, s), 5.62 (1H, d, J = 5.5), 5.33 (1H, d, J = 5.7), 4.03-4.06 (2H, t, J = 7.2), 1.83 (2H, q), 1.25-1.39 (4H, m), 0.88 (3H, t, J = 7.0). <sup>13</sup>C NMR (100 MHz DMSO-d<sub>6</sub>): 173.9, 167.2, 166.0, 160.5, 152.6, 148.3, 141.1, 139.7, 137.0, 125.6, 122.2, 114.2, 111.0, 106.3, 103.8, 68.2, 59.6, 58.1, 28.7, 28.3, 22.7, 14.0. MS (ESI) m/z (% of relative abundance) calculated for [C<sub>24</sub>H<sub>22</sub>ClFN<sub>2</sub>O<sub>5</sub>]<sup>+</sup> 472.12: Found 473.05 (M+1). Elemental analysis: C (60.96%), H (4.69%), N (5.92%). Found C (60.95%), H (4.66%), N (5.82%).

### General procedure of synthesis of 6-fluoro-4-oxo-7-(4-oxo-1,3-thiazolidin-3-yl)-1,4-dihydroquinoline-3-carboxylic acid derivatives (2c-j) (substitution reaction)

Spectral data of (FQ-131): <sup>1</sup>H NMR (400 MHz, DMSO-d<sub>6</sub>, ppm): δ 15.49 (1H, s), 13.29 (1H, s), 8.69 (1H, s), 7.85 (1H, s), 7.30-7.48 (7H, m), 6.94 (2H, ddd, J = 8.8), 6.36 (1H, s), 3.89-4.08 (2H, d, J = 15). <sup>13</sup>C NMR (100 MHz DMSO-d<sub>6</sub>): 173.8, 170.6, 166.0, 160.4, 152.4, 148.3, 141.0, 139.3, 136.7, 128.7, 127.8, 127.8, 122.2, 114.2, 111.0, 106.3, 103.8, 69.7, 68.2, 34.6. ESI m/z (% of relative abundance) calculated for [C<sub>26</sub>H<sub>19</sub>FN<sub>2</sub>O<sub>5</sub>S]<sup>+</sup> 490.21: Found 491.35 (M+1) Elemental analysis :C(63.67%), H (3.90%), N (5.71%). Found C (63.56%), H (3.91%), N (5.72%).

Spectral data (FQ-132): <sup>1</sup>H NMR (400 MHz, DMSO-d<sub>6</sub>, ppm): δ 15.43 (1H, s), 13.33 (1H, s), 8.51 (1H, s), 7.88 (1H, s), 7.33 (2H, d, J = 8.4 Hz), 7.08 (2H, d, J = 8.8), 6.80 (1H, d, J = 0.5 Hz), 6.35 (1H, s), 3.97 (2H, q, ), 3.89 (2H, d, J = 15.4 Hz), 1.78 (4H, m), 0.86 (3H, t, J = 7.1 Hz). <sup>13</sup>C NMR (DMSO): 173.9, 170.0, 166.1, 160.3, 152.6, 148.3, 141.1, 139.1, 137.0, 127.1, 111.0, 106.1, 103.1, 68.9, 68.5, 34.1, 32.7, 19.1, 13.0. ESI m/z (% of relative abundance) calculated for [C<sub>23</sub>H<sub>21</sub>FN<sub>2</sub>O<sub>5</sub>S]<sup>+</sup> 456.11: Found 457.21 (M+1). Elemental analysis: C (60.52%), H (4.64%), N (6.14%), Found C (60.50%), H (4.54%), N (6.12%).

Spectral data of (FQ-137). <sup>1</sup>H NMR (400 MHz, DMSO-d<sub>6</sub>, ppm): δ 15.49 (1H, s), 13.86 (1H, s), 9.36 (2H, s), 8.76 (1H, s), 7.89 (1H, d, J = 0.5 Hz), 7.32 (1H, d, J = 2.6 Hz), 6.90 (1H, d, J = 0.5 Hz), 6.88 (1H, d, J = 8.4), 6.65 (1H, d, J = 8.4Hz), 6.64 (1H, s), 3.9-4.05 (2H, m). <sup>13</sup>C NMR (100 MHz DMSO-d<sub>6</sub>): 173.9, 170.1, 166.0 152.5, 148.9 146.6, 145.1, 141.0, 137.2, 136.9, 136.9, 127.0, 122.2, 113.9, 111.0, 106.0, 103.6, 68.0, 34.0. ESI m/z (% of relative abundance) calculated for [C<sub>19</sub>H<sub>13</sub>FN<sub>2</sub>O<sub>6</sub>S]<sup>+</sup> 416.38. Found 417.42 (M+1) Elemental analysis: C (54.81%), H (3.15%), N (6.73%), Found C (54.71%), H (3.10%), N (6.70%).

Spectral data of (FQ-147): <sup>1</sup>H NMR (400 MHz, DMSO-d<sub>6</sub>, ppm): δ 15.48 (1H, s), 13.22 (1H, s), 9.84 (1H, s), 8.63 (1H, s), 6.74-7.89 (5H, m), 6.39 (1H, s), 3.9 (2H, q), 1.26 (3H, t), 3.6 (2H, d, J = 8.3). <sup>13</sup>C NMR (100 MHz DMSO-d<sub>6</sub>): 174.0, 171.1, 166.0 152.9, 148.2, 145.7, 141.3, 137.1, 136.1, 127.1, 122.0, 115.3, 111.1, 106.1, 103.3, 68.8, 64.3, 34.5, 14.3. ESI m/z (% of relative abundance) calculated for [C<sub>21</sub>H<sub>17</sub>FN<sub>2</sub>O<sub>6</sub>S]<sup>+</sup> 444.07. Found 445.35 (M+1). Elemental analysis calculated: C (56.75%), H (3.86%), N (6.30%). Found C (56.65%), H (3.56%), N (6.22%).

Spectral data of (FQ-151): <sup>1</sup>H NMR : δ 14.64 (1H, s), 13.19 (1H, s), 8.54 (1H, s), 6.89 (5H, m), 6.34 (1H, s), 4.01 (2H, t, J = 7.4 Hz), 3.67(2H, t, J = 15.9 Hz), 1.23 (6H, m), 0.86 (3H, t, J = 7.0 Hz). <sup>13</sup>C NMR (100 MHz DMSO-d<sub>6</sub>): 173.1, 170.12, 166.5, 160.2, 152.6, 149.2, 141.3, 139.6, 137.6, 127.4, 122.2, 114.2, 111.8, 106.3, 103.6, 68.5, 34.9, 31.9, 29.2, 25.4, 22.1, 22.1, 14.0. MS (ESI) m/z (% of relative abundance) calculated for [C<sub>25</sub>H<sub>25</sub>FN<sub>2</sub>O<sub>5</sub>S]<sup>+</sup> 484.14. Found 485.38 (M+1). Elemental analysis calculated C (61.97%), H (5.20%), N (5.78%). Found C (61.92%), H (5.22%), N (5.68%).

Spectral data (FQ-172): <sup>1</sup>H NMR (400 MHz, DMSO-d<sub>6</sub>, ppm), δ 15.39 (1H, s), 13.26 (1H, s), 8.70 (1H, s), 6.88-7.82 (5H, m), 6.33 (1H, s), 4.03 (3H, t, J = 7.4 Hz), 3.70-3.99 (2H, t, J = 15.6 Hz), 1.28-1.89 (6H, m), 1.29 (1H, s, ), 0.89 (3H, t, J = 7.0 Hz). <sup>13</sup>C NMR (100 MHz DMSO-d<sub>6</sub>): 172.9, 168.9, 166.0, 160.5, 152.5, 148.3, 141.1, 139.7, 137.3, 127.3, 122.2, 114.2, 111.1, 106.3, 103.8, 68.5, 68.2, 34.3, 28.7, 22.6, 14.0. MS (ESI) m/z (% of relative abundance) calculated for [C<sub>24</sub>H<sub>23</sub>FN<sub>2</sub>O<sub>5</sub>S]<sup>+</sup> 470.21. Found: 471.32 (M+1). Elemental analysis calculated C (61.27%), H (4.93%), N (5.95%). Found C (61.25%), H (4.82%), N (5.91%).

Spectral data of (FQ-177): <sup>1</sup>H NMR (400 MHz, DMSO-d<sub>6</sub>, ppm): δ 15.39 (1H, s), 13.26 (1H, s), 8.70 (1H, s), 6.88-7.82 (5H, m), 6.34 (1H, s), 4.01(3H, t, J = 15.9 Hz), 3.64 (2H, t, J = 15.9 Hz), 1.80 (2H, d, J = 7.5 Hz), 0.91 (3H, t, J = 7.5 Hz). <sup>13</sup>C NMR (100 MHz DMSO-d<sub>6</sub>): 173.9, 170, 166.1, 160.3, 152.6, 148.3, 141.1, 139.1, 137.0, 127.1, 122.1, 114.2, 111, 106.12, 103.10, 70.02, 68.53, 34.17, 22.78, 10.55. MS (ESI) m/z (% of relative abundance) calculated for [C<sub>22</sub>H<sub>19</sub>FN<sub>2</sub>O<sub>5</sub>S]<sup>+</sup> 442.25 Found 443.28. Elemental analysis calculated C (59.72%), H (4.33%), N (6.33%). Found C (59.62%), H (4.31%), N (6.30%).

Spectral data of (FQ-182): <sup>1</sup>H NMR (400 MHz, DMSO-d<sub>6</sub>, ppm): δ 15.45 (1H, s), 13.22 (1H, s), 8.69 (1H, s), 7.98-6.90- (5H, m), 6.48 (1H, s), 3.65 (2H, dd, J = 15.9 Hz). <sup>13</sup>C NMR (100 MHz DMSO-d<sub>6</sub>): 174, 171.1, 166, 153.1, 152.9, 148.2, 141.3, 137.1, 136.1, 128.7, 122, 116.3, 111.1, 106.1, 103.3, 68.8, 34.5. MS (ESI) m/z (% of relative abundance) calculated for [C<sub>19</sub>H<sub>13</sub>FN<sub>2</sub>O<sub>5</sub>S]<sup>+</sup> 400.42. Found: 401.33. Elemental analysis calculated C (57.00%), H (3.27%), N (7.00%). Found C (57.10%), H (3.13%), N (7.02%).

Table S1

**Multiple Linear Regression Model**

MLR algorithm developed an activity predicting equation using structural properties of 45 training set compounds. It contains the following equation:

$$\begin{aligned}
 [\text{FQ-MLR}] = & -109.2 + 160.5 * [\text{AlogP}] + 21.78 * [\text{Molecular Weight}] + 79.55 * [\text{No. of HBD}] + 67.48 * [\text{No. of HBA}] - 356.1 * [\text{No. of RB}] - 1035 * [\text{No. of Rings}] - 841.9 * [\text{No. of AR}] \\
 & + 9.641 * [\text{MFSA}] - 109.4 * [\text{Count<ECFP}_6\text{:781519895>}] - 109.4 * [\text{Count<ECFP}_6\text{:1100000244>}] - 109.3 * [\text{Count<ECFP}_6\text{:1074141656>}] - 109.3 * [\text{Count<ECFP}_6\text{:642810091>}] \\
 & - 109.3 * [\text{Count<ECFP}_6\text{:182236392>}] - 109.3 * [\text{Count<ECFP}_6\text{:670515721>}] + 261.6 * [\text{Count<ECFP}_6\text{:167460056>}] - 109.3 * [\text{Count<ECFP}_6\text{:992506539>}] \\
 & - 109.3 * [\text{Count<ECFP}_6\text{:1046436026>}] - 25.29 * [\text{Count<ECFP}_6\text{:1059365320>}] + 82.69 * [\text{Count<ECFP}_6\text{:734603939>}] - 643.3 * [\text{Count<ECFP}_6\text{:1087070950>}] \\
 & - 35.92 * [\text{Count<ECFP}_6\text{:1416572622>}] - 109.3 * [\text{Count<ECFP}_6\text{:655344035>}] - 109.2 * [\text{Count<ECFP}_6\text{:978469901>}] - 109.2 * [\text{Count<ECFP}_6\text{:2099970318>}] - 109.2 * [\text{Count<ECFP}_6\text{:2132762635>}] \\
 & - 14.19 * [\text{Count<ECFP}_6\text{:471356069>}] - 249.6 * [\text{Count<ECFP}_6\text{:1811420270>}] - 769.3 * [\text{Count<ECFP}_6\text{:586331102>}] + 493.5 * [\text{Count<ECFP}_6\text{:1531301414>}] \\
 & - 197.3 * [\text{Count<ECFP}_6\text{:1951894094>}] - 525.5 * [\text{Count<ECFP}_6\text{:757679000>}] - 365.9 * [\text{Count<ECFP}_6\text{:756348342>}] + 290 * [\text{Count<ECFP}_6\text{:1311285389>}] \\
 & - 109.2 * [\text{Count<ECFP}_6\text{:220735655>}] + 534.1 * [\text{Count<ECFP}_6\text{:786013480>}] - 109.2 * [\text{Count<ECFP}_6\text{:1717462980>}] - 109.2 * [\text{Count<ECFP}_6\text{:2106656448>}] \\
 & + 66.62 * [\text{Count<ECFP}_6\text{:64909220>}] - 551.8 * [\text{Count<ECFP}_6\text{:408704017>}] - 109.2 * [\text{Count<ECFP}_6\text{:662690992>}] + 121.1 * [\text{Count<ECFP}_6\text{:850565340>}] \\
 & + 149.5 * [\text{Count<ECFP}_6\text{:273513279>}] - 283.4 * [\text{Count<ECFP}_6\text{:1559650422>}] - 103.9 * [\text{Count<ECFP}_6\text{:1629170274>}] + 154 * [\text{Count<ECFP}_6\text{:1236953626>}] \\
 & + 65.93 * [\text{Count<ECFP}_6\text{:1475015494>}] - 140.8 * [\text{Count<ECFP}_6\text{:805779993>}] + 129.1 * [\text{Count<ECFP}_6\text{:1134083857>}] + 411.6 * [\text{Count<ECFP}_6\text{:1572579716>}] - 1.622 \\
 & * [\text{Count<ECFP}_6\text{:410962435>}] - 91.3 * [\text{Count<ECFP}_6\text{:1249514790>}] - 162.5 * [\text{Count<ECFP}_6\text{:949601813>}] - 532.8 * [\text{Count<ECFP}_6\text{:863188371>}] + 128.8 * [\text{Count<ECFP}_6\text{:922113275>}] \\
 & + 71.22 * [\text{Count<ECFP}_6\text{:770547857>}] + 192.3 * [\text{Count<ECFP}_6\text{:580726395>}] + 158.3 * [\text{Count<ECFP}_6\text{:655739385>}] - 113.1 * [\text{Count<ECFP}_6\text{:1242983843>}] \\
 & + 6.33 * [\text{Count<ECFP}_6\text{:249785178>}] + 78.98 * [\text{Count<ECFP}_6\text{:1530134975>}] + 78.89 * [\text{Count<ECFP}_6\text{:526062157>}] - 637.2 * [\text{Count<ECFP}_6\text{:1043790491>}] \\
 & + 207.7 * [\text{Count<ECFP}_6\text{:1869628272>}] - 249.2 * [\text{Count<ECFP}_6\text{:1331450522>}] + 38.45 * [\text{Count<ECFP}_6\text{:779801757>}] - 153.7 * [\text{Count<ECFP}_6\text{:100084568>}] \\
 & - 333.8 * [\text{Count<ECFP}_6\text{:342267039>}] + 192.2 * [\text{Count<ECFP}_6\text{:1757441599>}] - 742.8 * [\text{Count<ECFP}_6\text{:676041646>}] - 186.1 * [\text{Count<ECFP}_6\text{:1151284196>}] \\
 & - 112.9 * [\text{Count<ECFP}_6\text{:655871555>}] + 90.3 * [\text{Count<ECFP}_6\text{:344562737>}].
 \end{aligned}$$

Molecular properties of the input 58 molecules

| Name | AlogP  | Mol. Weight | No of AR | No of HBA | No of HBD | No of Rings | No of RB | MFSA  |
|------|--------|-------------|----------|-----------|-----------|-------------|----------|-------|
| 9a1  | -1.703 | 436.409     | 1        | 9         | 2         | 4           | 5        | 0.281 |
| 9a3  | -1.951 | 422.383     | 1        | 9         | 2         | 4           | 6        | 0.293 |
| 9b1  | -1.687 | 406.383     | 1        | 8         | 2         | 4           | 4        | 0.282 |
| 9b2  | -1.562 | 420.41      | 1        | 8         | 2         | 4           | 6        | 0.27  |
| 9b3  | -1.935 | 392.357     | 1        | 8         | 2         | 4           | 5        | 0.296 |
| 9b4  | -0.328 | 482.479     | 2        | 8         | 2         | 5           | 7        | 0.239 |
| 9b5  | -1.935 | 392.357     | 1        | 8         | 2         | 4           | 5        | 0.296 |
| 9b6  | -1.586 | 406.383     | 1        | 8         | 2         | 4           | 6        | 0.283 |
| 9b7  | -0.352 | 468.453     | 2        | 8         | 2         | 5           | 7        | 0.249 |
| 9b8  | -1.935 | 392.357     | 1        | 8         | 2         | 4           | 5        | 0.296 |
| 9b9  | -1.586 | 406.383     | 1        | 8         | 2         | 4           | 6        | 0.283 |
| 9b10 | -0.352 | 468.453     | 2        | 8         | 2         | 5           | 7        | 0.249 |
| 9c1  | -1.022 | 440.828     | 1        | 8         | 2         | 4           | 4        | 0.268 |
| 9c2  | -0.898 | 454.855     | 1        | 8         | 2         | 4           | 6        | 0.257 |
| 9c3  | -1.271 | 426.802     | 1        | 8         | 2         | 4           | 5        | 0.28  |
| 9c4  | 0.337  | 516.924     | 2        | 8         | 2         | 5           | 7        | 0.229 |
| 9d1  | -1.759 | 407.371     | 1        | 9         | 2         | 4           | 4        | 0.316 |
| 9d2  | -1.635 | 421.398     | 1        | 9         | 2         | 4           | 6        | 0.302 |

|               |        |         |   |    |   |   |   |       |
|---------------|--------|---------|---|----|---|---|---|-------|
| 9d3           | -2.008 | 393.345 | 1 | 9  | 2 | 4 | 5 | 0.331 |
| 9d4           | -0.4   | 483.467 | 2 | 9  | 2 | 5 | 7 | 0.267 |
| 9d5           | -2.008 | 393.345 | 1 | 9  | 2 | 4 | 5 | 0.331 |
| 9d6           | -1.659 | 407.371 | 1 | 9  | 2 | 4 | 6 | 0.316 |
| 9d7           | -0.424 | 469.441 | 2 | 9  | 2 | 5 | 7 | 0.278 |
| 9d8           | -2.008 | 393.345 | 1 | 9  | 2 | 4 | 5 | 0.331 |
| 9d9           | -1.659 | 407.371 | 1 | 9  | 2 | 4 | 6 | 0.316 |
| 9d10          | -0.424 | 469.441 | 2 | 9  | 2 | 5 | 7 | 0.278 |
| Bay           | 0.175  | 370.417 | 1 | 5  | 2 | 5 | 3 | 0.205 |
| Bay-DNP       | 4.876  | 536.508 | 2 | 9  | 1 | 6 | 6 | 0.311 |
| Cip-2NP       | 3.537  | 452.435 | 2 | 8  | 1 | 5 | 5 | 0.258 |
| Cip-4NP       | 3.537  | 452.435 | 2 | 8  | 1 | 5 | 5 | 0.258 |
| Cip-DAP       | 2.15   | 437.467 | 2 | 8  | 3 | 5 | 4 | 0.276 |
| Cip-DFP       | 4.054  | 443.418 | 2 | 6  | 1 | 5 | 4 | 0.156 |
| Cip-DMP       | 4.615  | 435.491 | 2 | 6  | 1 | 5 | 4 | 0.149 |
| Cip-DNP       | 3.432  | 497.433 | 2 | 10 | 1 | 5 | 6 | 0.336 |
| Cip-DOMe      | 3.61   | 467.489 | 2 | 8  | 1 | 5 | 6 | 0.18  |
| CipEt         | -1.648 | 305.304 | 1 | 6  | 3 | 3 | 5 | 0.327 |
| CipEt-DNP     | 2.906  | 471.395 | 2 | 10 | 3 | 4 | 9 | 0.396 |
| CipOMe        | -1.286 | 361.368 | 1 | 7  | 2 | 4 | 4 | 0.237 |
| CipOMe-DNP    | 3.415  | 527.459 | 2 | 11 | 1 | 5 | 7 | 0.331 |
| Cip-P         | 3.643  | 407.437 | 2 | 6  | 1 | 5 | 4 | 0.165 |
| Ciprofloxacin | -1.27  | 331.342 | 1 | 6  | 2 | 4 | 3 | 0.234 |
| Enoxacin      | -1.483 | 320.319 | 1 | 7  | 2 | 3 | 3 | 0.268 |
| Gemifloxacin  | -1.833 | 389.381 | 1 | 9  | 2 | 4 | 5 | 0.323 |
| Lev-DNP       | 3.847  | 512.444 | 2 | 10 | 1 | 5 | 5 | 0.338 |
| Levofloxacin  | -1.374 | 361.368 | 1 | 7  | 1 | 4 | 2 | 0.206 |
| Moxi-DNP      | 4.86   | 566.534 | 2 | 10 | 1 | 6 | 7 | 0.307 |
| Moxifloxacin  | -0.702 | 401.431 | 1 | 7  | 2 | 5 | 4 | 0.218 |
| Nap-DNP       | 3.898  | 497.433 | 2 | 10 | 1 | 5 | 6 | 0.358 |
| NApthyridone  | -0.803 | 331.342 | 1 | 6  | 2 | 4 | 3 | 0.266 |
| Nor-DNP       | 3.291  | 485.422 | 2 | 10 | 1 | 4 | 6 | 0.331 |
| Norfloxacin   | -1.411 | 319.331 | 1 | 6  | 2 | 3 | 3 | 0.228 |
| Ofloxacin     | -1.374 | 361.368 | 1 | 7  | 1 | 4 | 2 | 0.206 |
| Sparfloxacin  | -1.056 | 392.4   | 1 | 7  | 3 | 4 | 3 | 0.263 |
| Trovafloxacin | -0.266 | 416.353 | 2 | 7  | 2 | 5 | 3 | 0.271 |
| Zabofloxacin  | -1.943 | 401.392 | 1 | 9  | 2 | 5 | 4 | 0.283 |
| Gatifloxacin  | -0.909 | 375.394 | 1 | 7  | 2 | 4 | 4 | 0.224 |
| Grepafloxacin | -0.406 | 359.395 | 1 | 6  | 2 | 4 | 3 | 0.207 |
| Clinafloxacin | -0.72  | 365.787 | 1 | 6  | 2 | 4 | 3 | 0.262 |

Table S2

## Experimental and Predicted activity of training set compounds

| Name | Experimental activity | Predicted activity | Name          | Experimental activity (mg) | Predicted activity |
|------|-----------------------|--------------------|---------------|----------------------------|--------------------|
| 9a1  | 0.06                  | 0.148155           | Cip-4NP       | 0.017                      | 0.017              |
| 9a3  | 0.25                  | 0.161845           | Cip-DFP       | 1.24                       | 1.24               |
| 9b1  | 0.25                  | 0.299436           | Cip-DMP       | 1.24                       | 1.24               |
| 9b2  | 0.03                  | 0.004986           | Cip-DNP       | 0.035                      | 0.035              |
| 9b3  | 0.06                  | 0.031483           | Cip-DOMe      | 1.18                       | 1.18               |
| 9b4  | 0.06                  | 0.035579           | CipOMe        | 0.011                      | 0.027055           |
| 9b6  | 0.03                  | 0.129673           | CipOMe-DNP    | 0.059                      | 0.042945           |
| 9b7  | 0.125                 | 0.131344           | Ciprofloxacin | 0.015                      | 0.015              |
| 9b8  | 0.06                  | 0.031483           | Enoxacin      | 0.01                       | 0.01               |
| 9b9  | 0.06                  | 0.129673           | gemifloxacin  | 0.01                       | 0.01               |
| 9b10 | 0.25                  | 0.131344           | Lev-DNP       | 0.029                      | 0.029              |
| 9c1  | 1                     | 0.74109            | Levofloxacin  | 0.022                      | 0.022              |
| 9c2  | 0.125                 | 0.295755           | Moxi-DNP      | 0.028                      | 0.028              |
| 9c3  | 0.5                   | 0.588155           | Moxifloxacin  | 0.025                      | 0.025              |
| 9d1  | 0.25                  | 0.371319           | Nap-DNP       | 0.0125                     | 0.028555           |
| 9d2  | 0.06                  | -0.10294           | NAphthridone  | 0.048                      | 0.031945           |
| 9d3  | 0.008                 | 0.157517           | Norfloxacin   | 0.094                      | 0.094              |
| 9d4  | 0.008                 | 0.049618           | Sparfloxacin  | 0.0125                     | 0.0125             |
| 9d6  | 0.125                 | 0.236425           | Trovafloxacin | 0.025                      | 0.025              |
| 9d7  | 0.125                 | 0.360058           | Gatifloxacin  | 0.05                       | 0.05               |
| 9d8  | 0.25                  | 0.157517           | Grepafloxacin | 0.008                      | 0.008              |
| 9d9  | 0.5                   | 0.236425           | Clinafloxacin | 0.015                      | 0.015              |
| 9d10 | 0.5                   | 0.360058           |               |                            |                    |

Table S3

Experimental and Predicted activity of test set compounds

| Name         | MIC ( $\mu\text{g/ml}$ ) |                    |
|--------------|--------------------------|--------------------|
|              | Experimental activity    | Predicted activity |
| 9c4          | 0.5                      | 0.508              |
| Bay          | 0.022                    | 0.032              |
| Bay-DNP      | 0.58                     | 0.752              |
| Cip-2NP      | 0.035                    | 0.017              |
| Cip-DAP      | 0.08                     | 0.06               |
| CipEt        | 1.31                     | 1.631              |
| CipEt-DNP    | 1.33                     | 1.603              |
| Cip-P        | 0.077                    | 0.07               |
| Nor-DNP      | 0.41                     | 0.123              |
| Ofloxacin    | 0.062                    | 0.022              |
| Zabofloxacin | 0.015                    | 0.016              |

Table S4

Physicochemical properties of synthesized compounds

| Compound | Rf Value | Yield % | M.P ( $^{\circ}\text{C}$ ) | Solubility  | Appearance    |
|----------|----------|---------|----------------------------|-------------|---------------|
| 1a       | 0.56     | 90      | 65-67                      | DMF         | Yellow        |
| 1b       | 0.61     | 75      | 102-103                    | Ethanol     | Brown         |
| 1c       | 0.49     | 72      | 96-97                      | Methanol    | Light brown   |
| FQ-49    | 0.51     | 72      | 118-119                    | n-Hexane    | Red           |
| FQ-70    | 0.61     | 69      | 115-116                    | n-Hexane    | Yellow        |
| FQ-131   | 0.52     | 77      | 154-146                    | 1,4 Dioxane | Orange yellow |
| FQ-132   | 0.57     | 74      | 133-134                    | 1,4 Dioxane | Yellow        |

|        |      |    |         |             |              |
|--------|------|----|---------|-------------|--------------|
| FQ-137 | 0.42 | 76 | 139-140 | 1,4 Dioxane | Light yellow |
| FQ-147 | 0.61 | 71 | 184-185 | 1,4 Dioxane | Brown        |
| FQ-151 | 0.51 | 70 | 177-178 | 1,4 Dioxane | Light brown  |
| FQ-172 | 0.60 | 72 | 144-145 | 1,4 Dioxane | Light brown  |
| FQ-177 | 0.62 | 71 | 140-141 | 1,4 Dioxane | Black        |
| FQ-182 | 0.48 | 77 | 128-129 | 1,4 Dioxane | Brown        |

Table S5

Activity comparison of FQ-151, FQ-172, FQ-132, FQ-177, FQ-49, and FQ-70 compounds

| Mol. No | Structure                                                                            | No. of Carbon (Alkyl chain) | MIC ( $\mu\text{M}$ ) |
|---------|--------------------------------------------------------------------------------------|-----------------------------|-----------------------|
| FQ-151  | 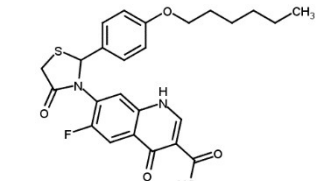   | 6-Chains                    | 1.03                  |
| FQ-172  |   | 5-Chain                     | 1.12                  |
| FQ-132  |  | 4-Chain                     | 1.48                  |
| FQ-177  |  | 3-Chain                     | 1.85                  |

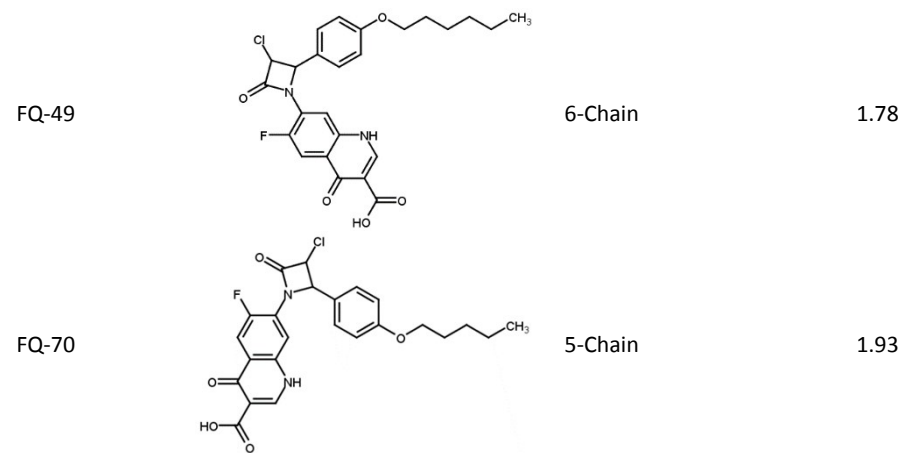

## Figures

Fig. S1



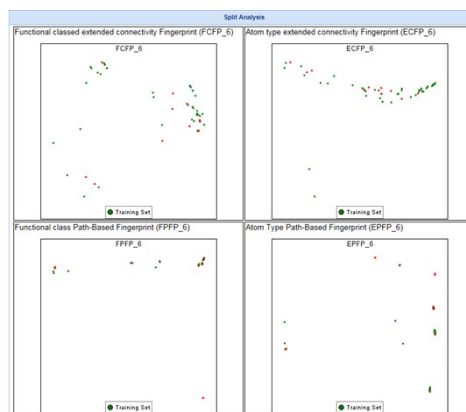

Fig. S1. Separation of 45 molecules as training set compounds based on functional, atom type extended connectivity and path-based fingerprint analysis.

Fig. S2

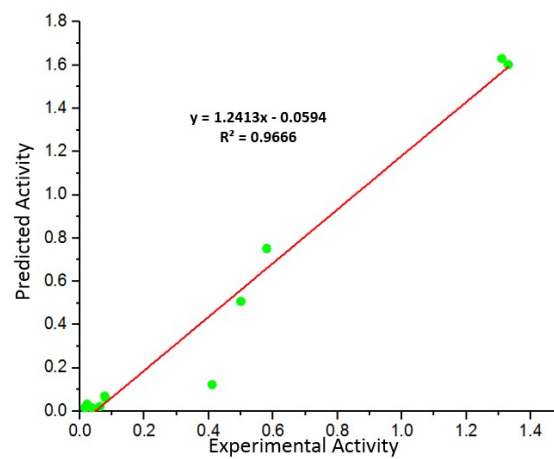

Fig.S2 Experimental and predicted activity of the 11 test set FQ molecules

Fig. S3

The spectra of HPLC of synthesized compounds

HPLC conditions were set as follows: instrument model: Shimadzu LPGE 30A w/o mixer; detector: 5  $\mu\text{m}$  C<sub>18</sub>: 4.6 mm $\times$  20 mm. The mobile phase A and B was water and acetonitrile (0.05% TFA) respectively. The gradient program was as follows: 0–20 min, 20% to 95% B; 30 min, 95% B (V/V).

**FQ-49**

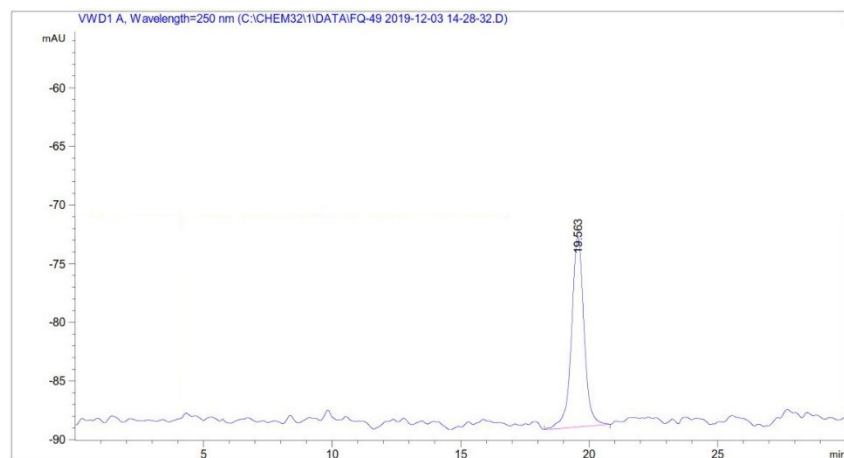

**FQ-70**

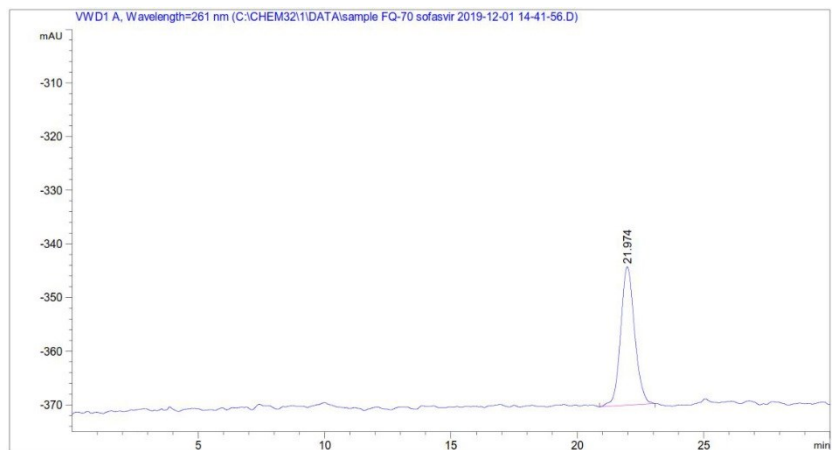

**FQ-131**

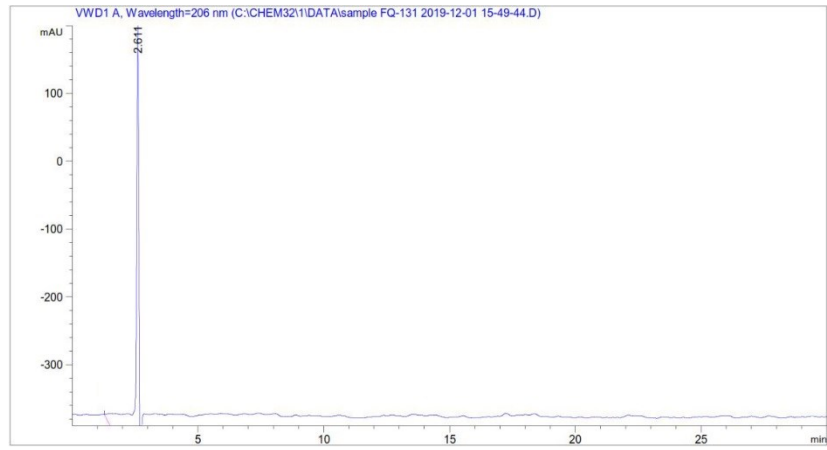

FQ-132

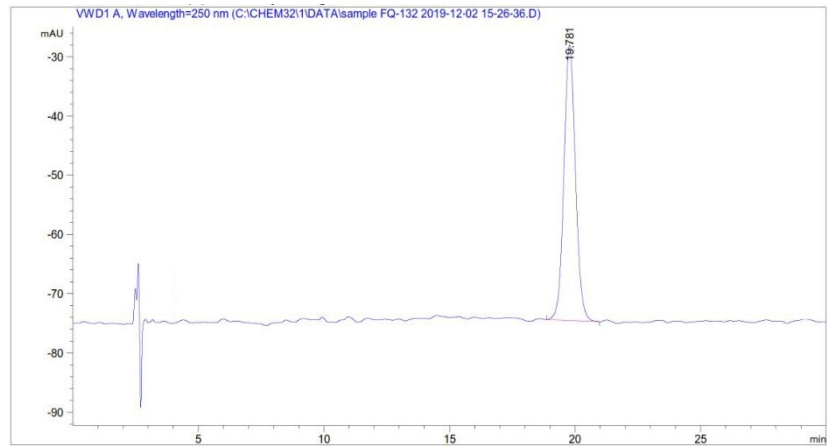

FQ-137

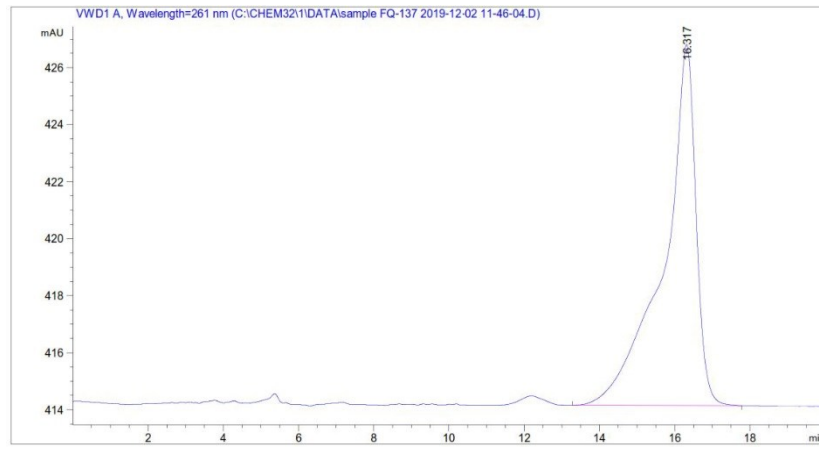

FQ-147

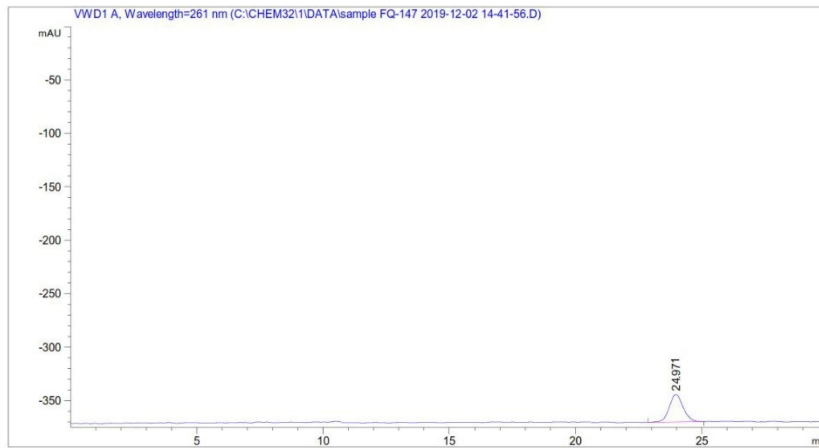

FQ-151

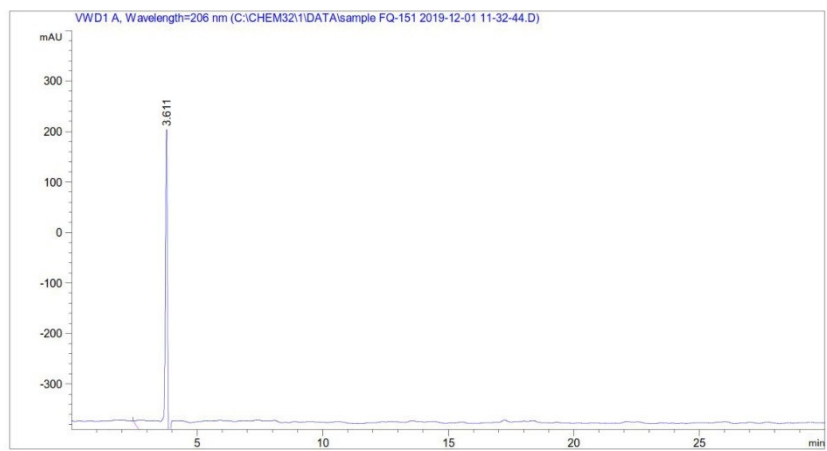

FQ-172

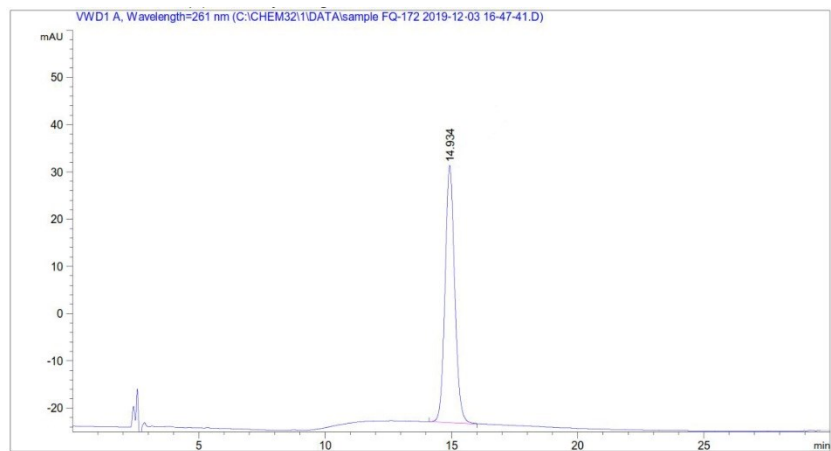

FQ-177

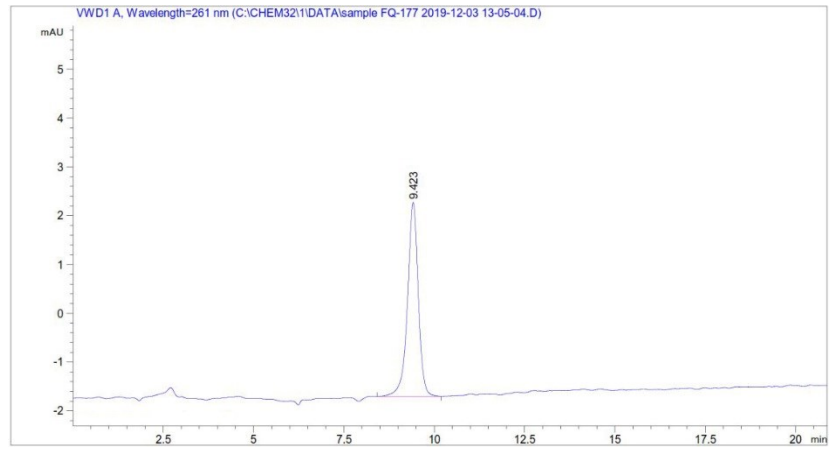

FQ-182

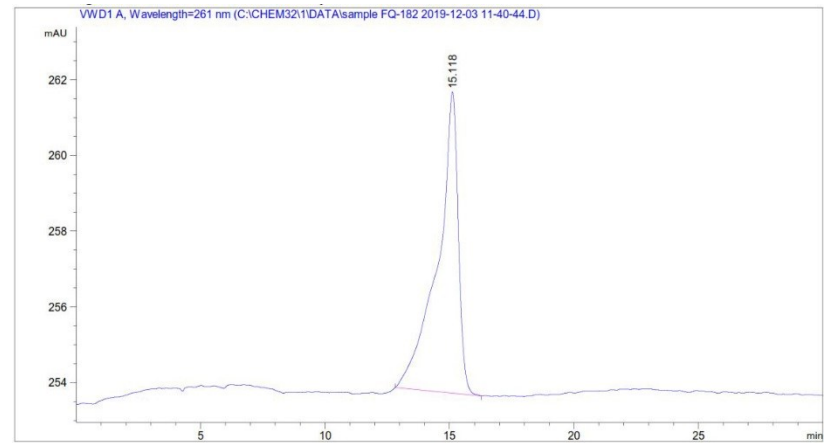

Fig. S4

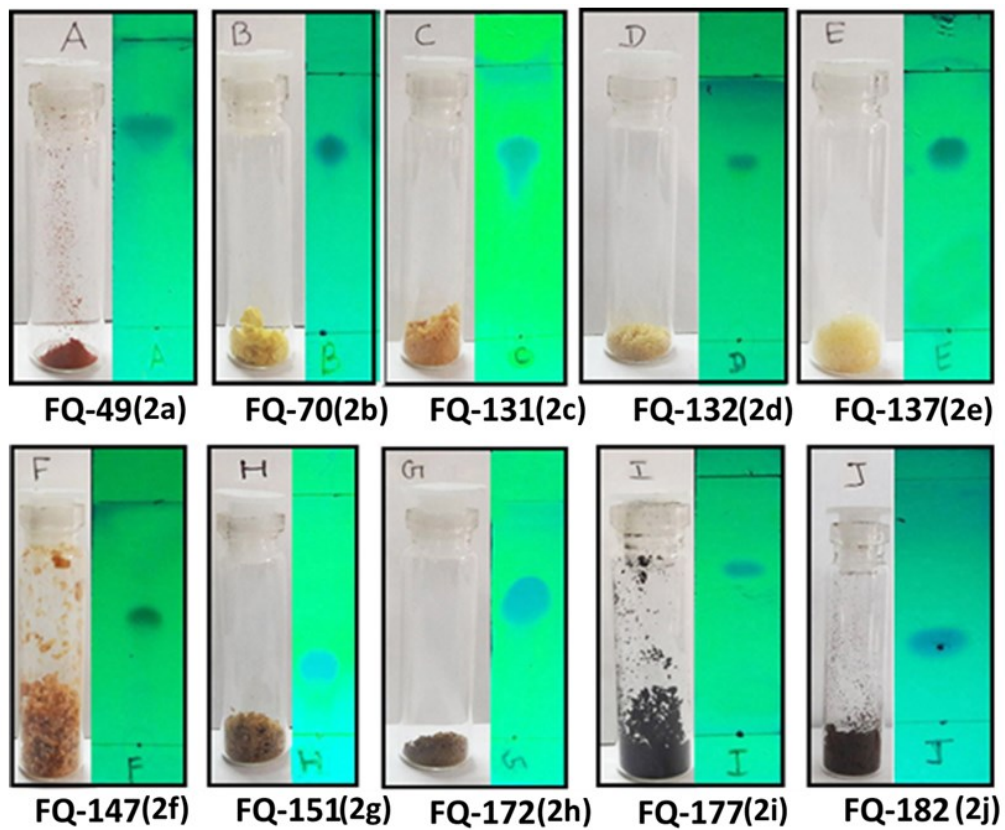

Fig S4 Synthesized compounds with TLC Results

Fig. S5

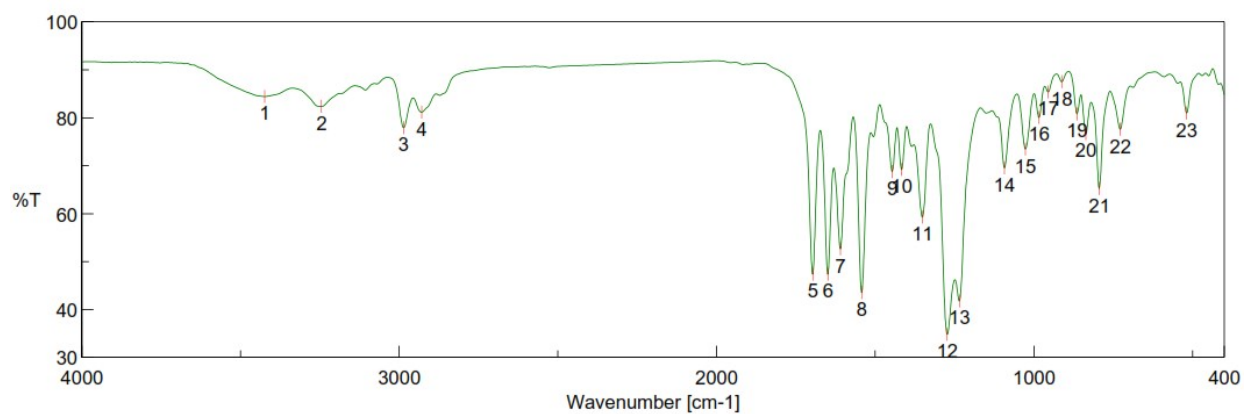

FT-IR spectrum of Ethyl 6-fluoro-7-nitro-4-oxo-1,4-dihydroquinoline-3-carboxylate (1a)

Fig S5 Characterization analysis

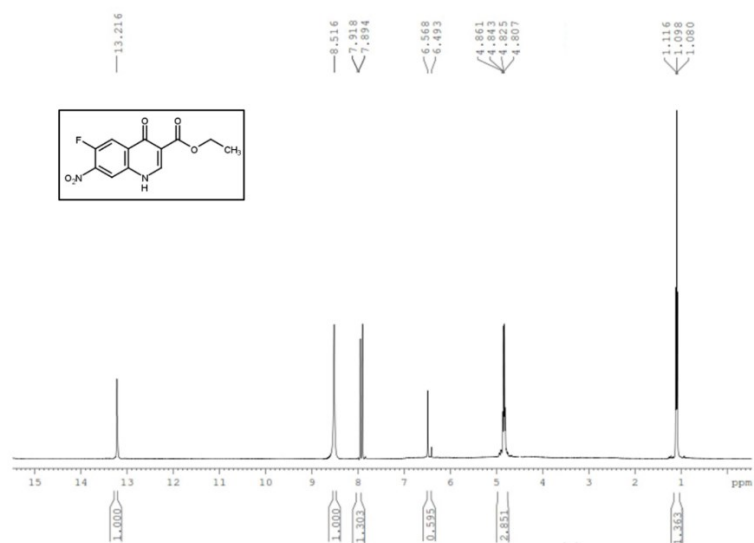

<sup>1</sup>H NMR spectrum of Ethyl 6-fluoro-7-nitro-4-oxo-1,4-dihydroquinoline-3-carboxylate (1a)



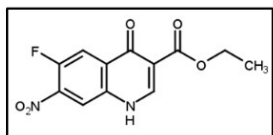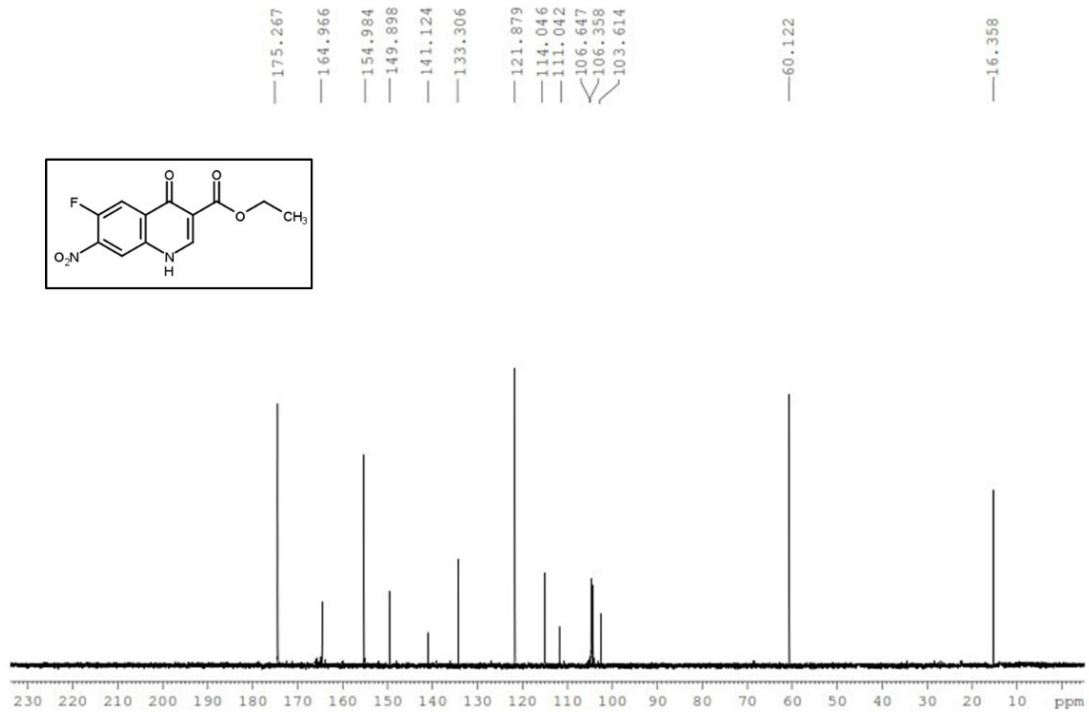

$^{13}\text{C}$  NMR spectrum of Ethyl 6-fluoro-7-nitro-4-oxo-1,4-dihydroquinoline-3-carboxylate (1a)

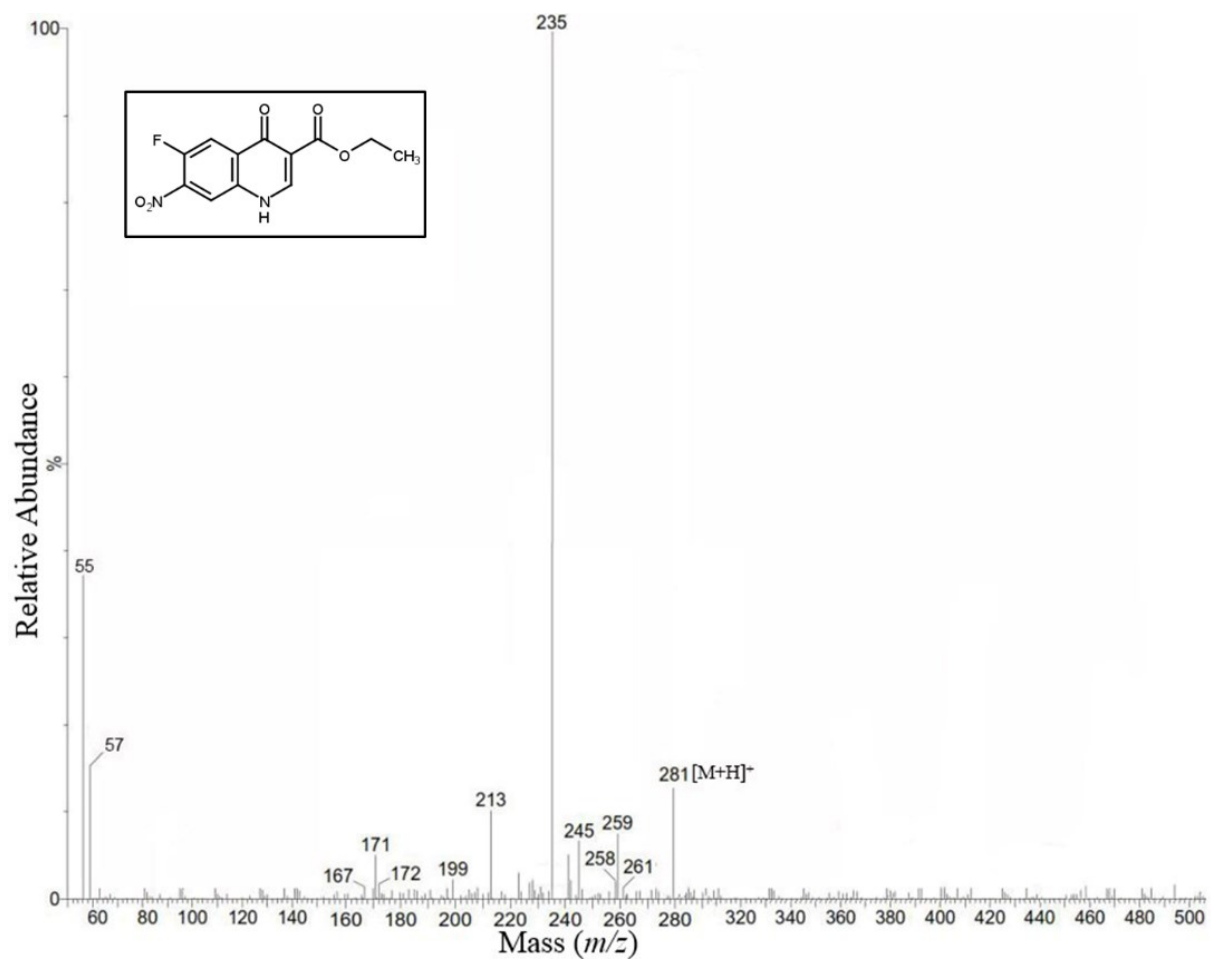

Mass spectroscopy of Ethyl 6-fluoro-7-nitro-4-oxo-1,4-dihydroquinoline-3-carboxylate (1a)

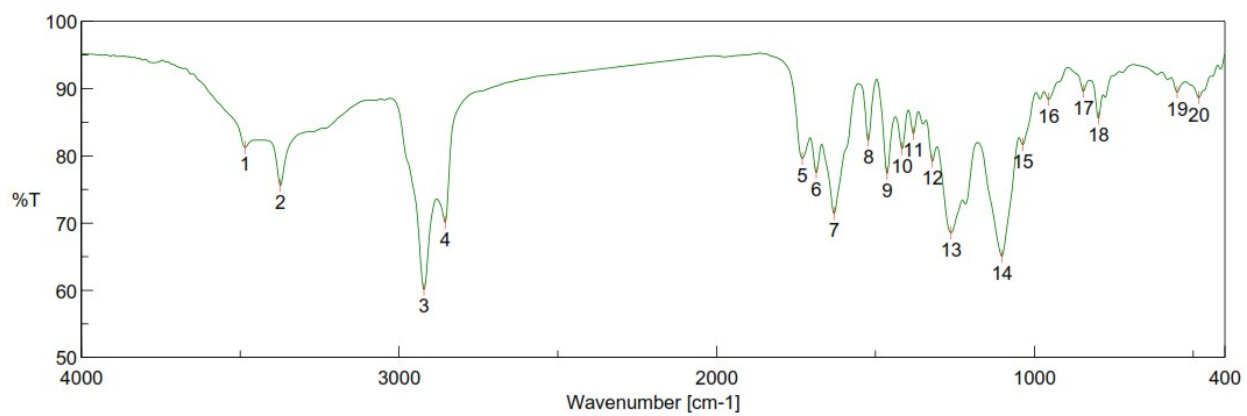

FT-IR spectrum of Ethyl 7-amino-6-fluoro-4-oxo-1,4-dihydroquinoline-3-carboxylate (1b)

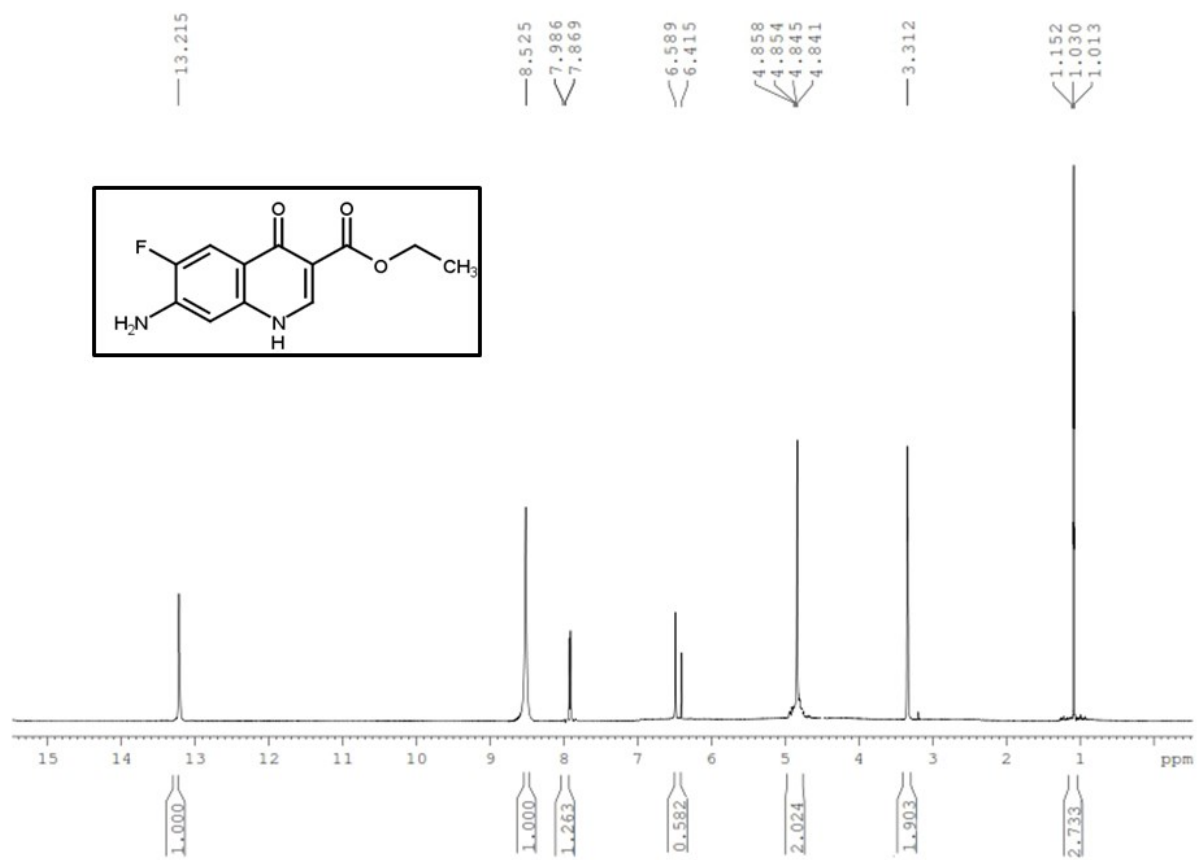

<sup>1</sup>H NMR spectrum of Ethyl 7-amino-6-fluoro-4-oxo-1,4-dihydroquinoline-3-carboxylate (1b)

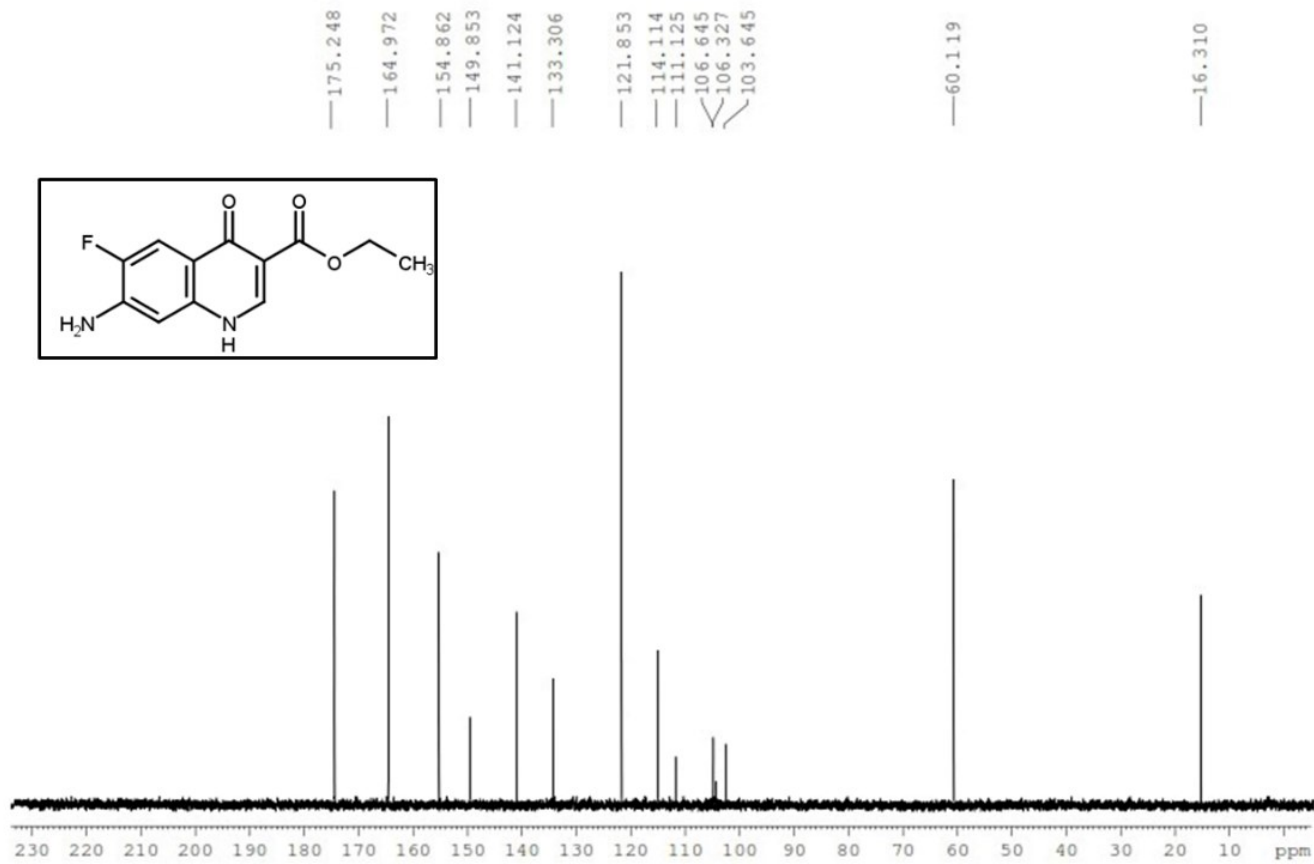

<sup>13</sup>C NMR spectrum of Ethyl 7-amino-6-fluoro-4-oxo-1,4-dihydroquinoline-3-carboxylate (1b)

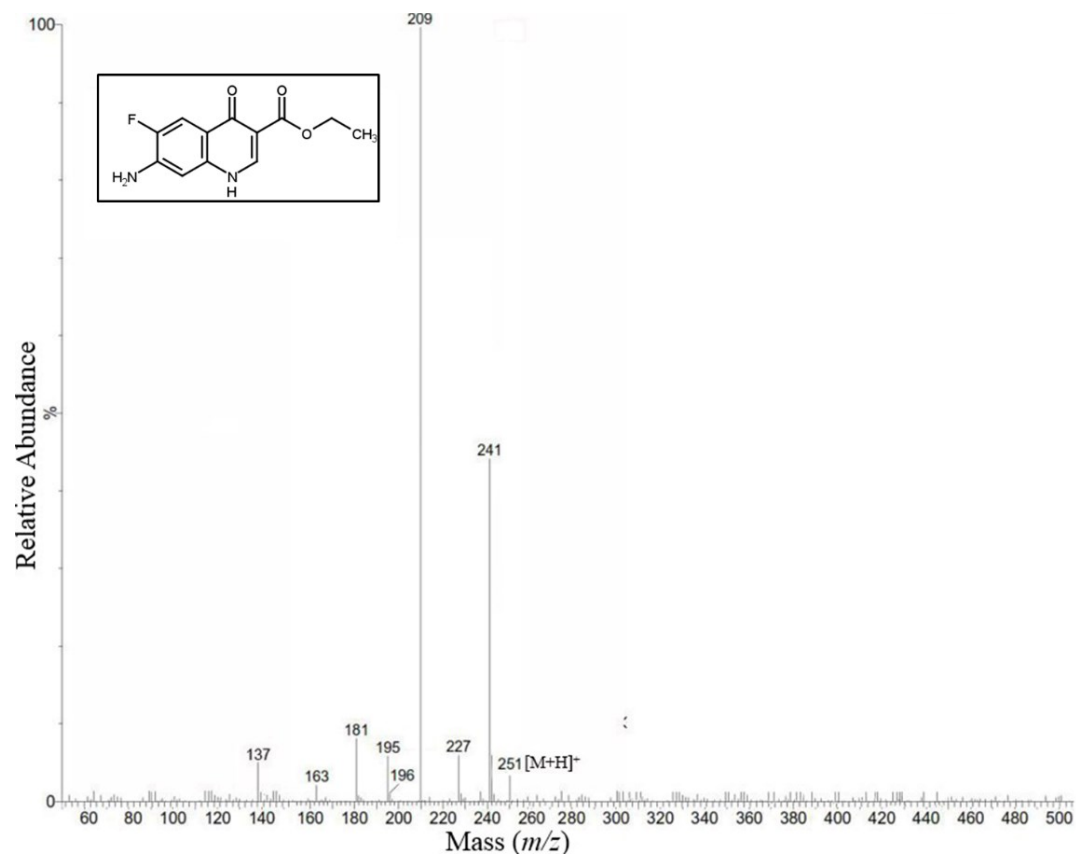

Mass spectrum of Ethyl 7-amino-6-fluoro-4-oxo-1,4-dihydroquinoline-3-carboxylate (1b)

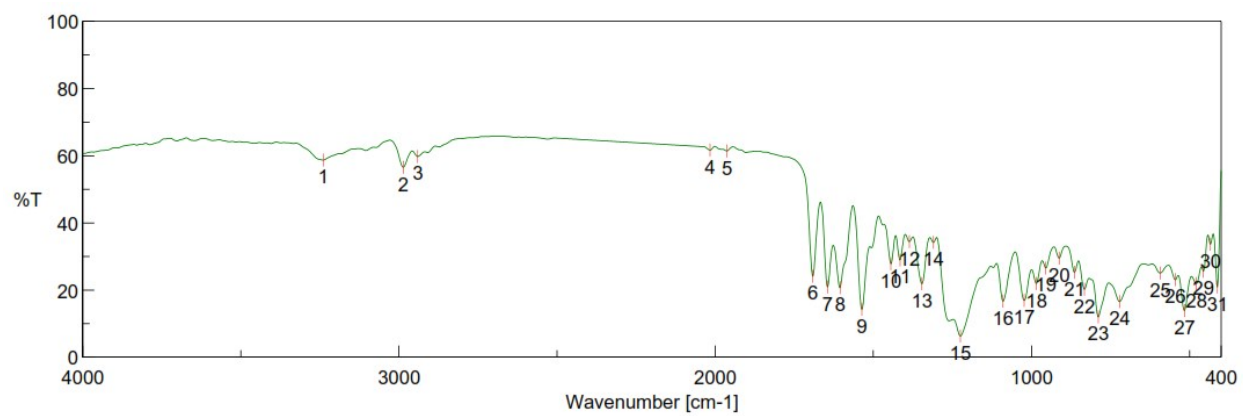

FT-IR Spectrum of 7-amino-6-fluoro-4-oxo-1,4-dihydroquinoline-3-carboxylic acid (1c)

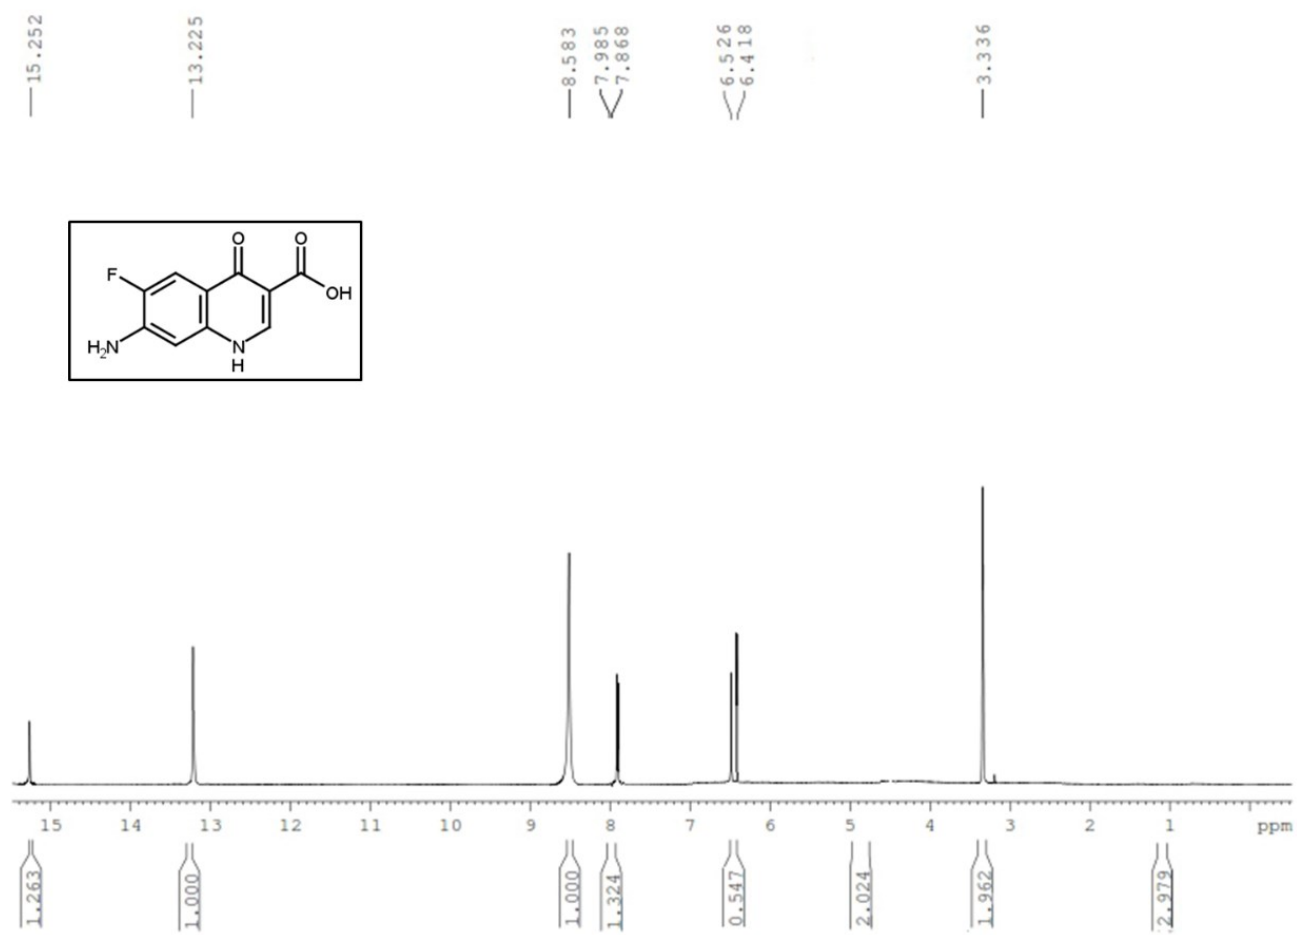

<sup>1</sup>H Spectrum of IR 7-amino-6-fluoro-4-oxo-1,4-dihydroquinoline-3-carboxylic acid (1c)



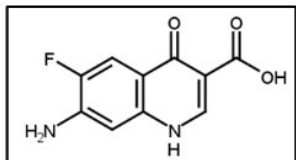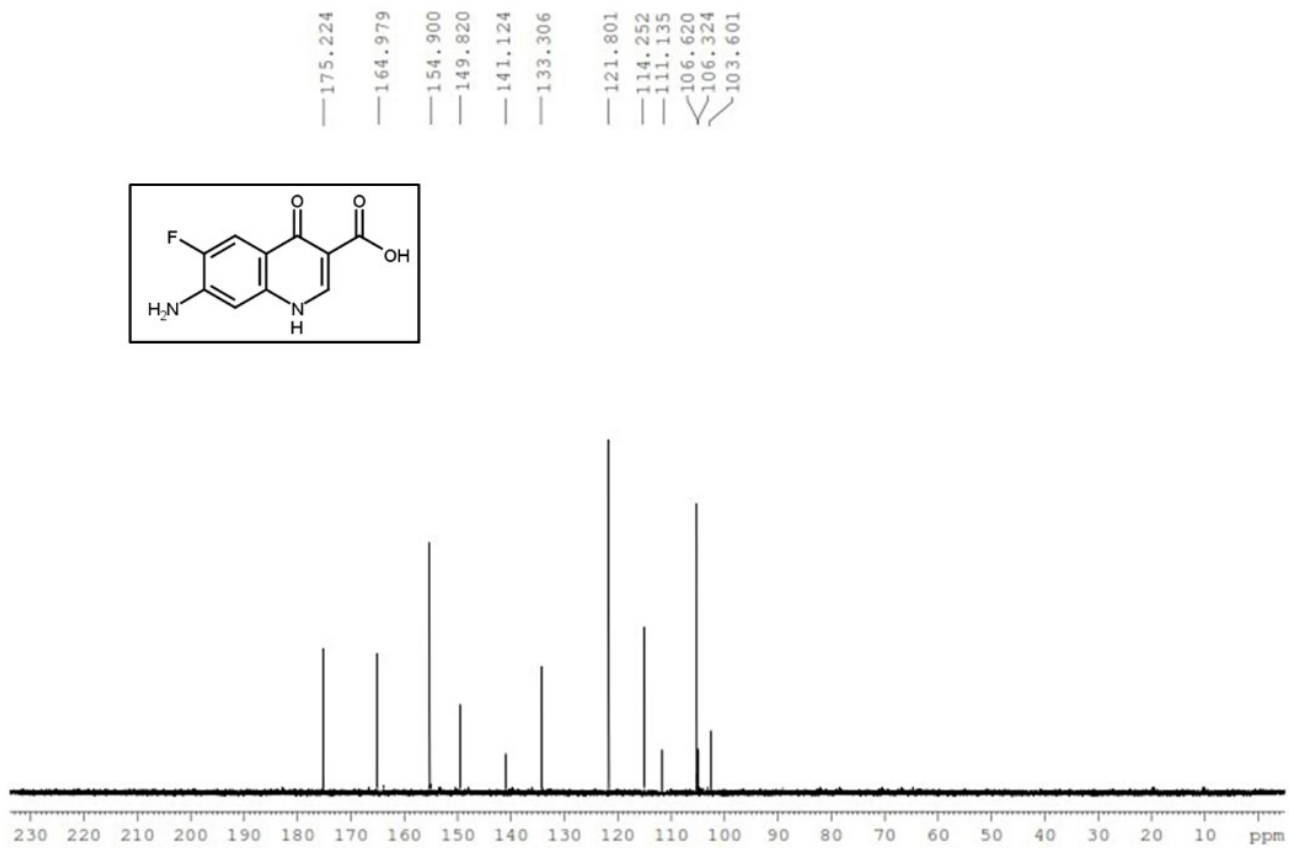

<sup>13</sup>C Spectrum of IR 7-amino-6-fluoro-4-oxo-1,4-dihydroquinoline-3-carboxylic acid (1c)

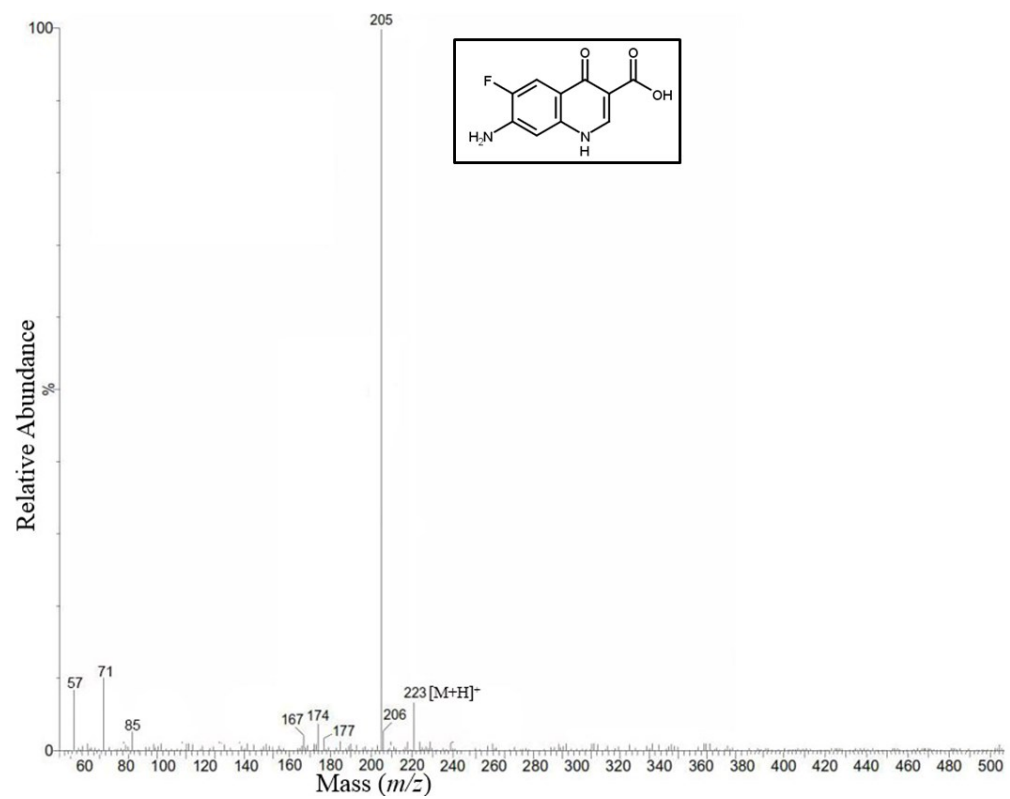

Mass Spectrum of IR 7-amino-6-fluoro-4-oxo-1,4-dihydroquinoline-3-carboxylic acid (1c)

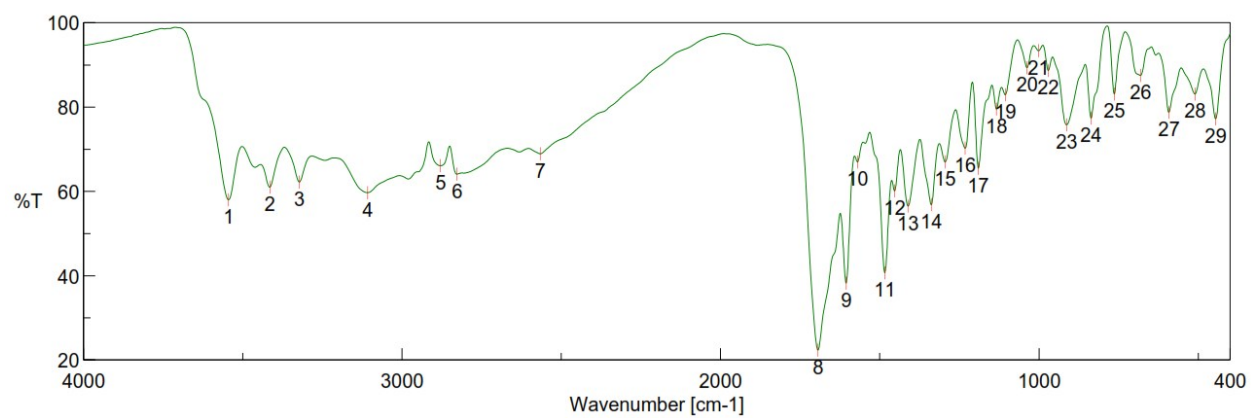

FT-IR spectrum of 7-{3-chloro-2-[4-(hexyloxy)phenyl]-4-oxoazetidin-1-yl}-6-fluoro-4-oxo-1,4-dihydroquinoline-3-carboxylic acid (FQ-49).

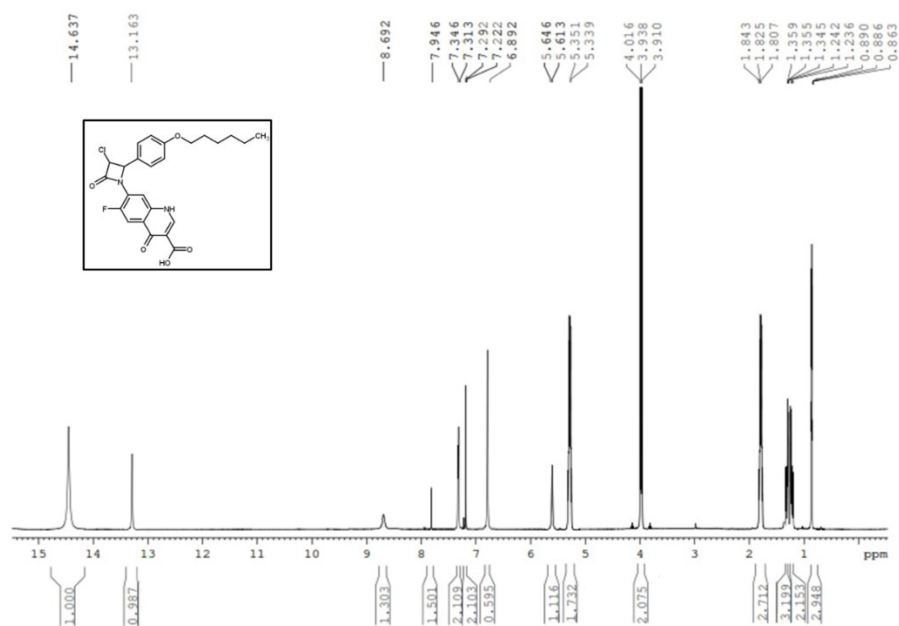

<sup>1</sup>H NMR spectrum of 7-{3-chloro-2-[4-(hexyloxy)phenyl]-4-oxoazetidin-1-yl}-6-fluoro-4-oxo-1,4-dihydroquinoline-3-carboxylic acid (FQ-49).

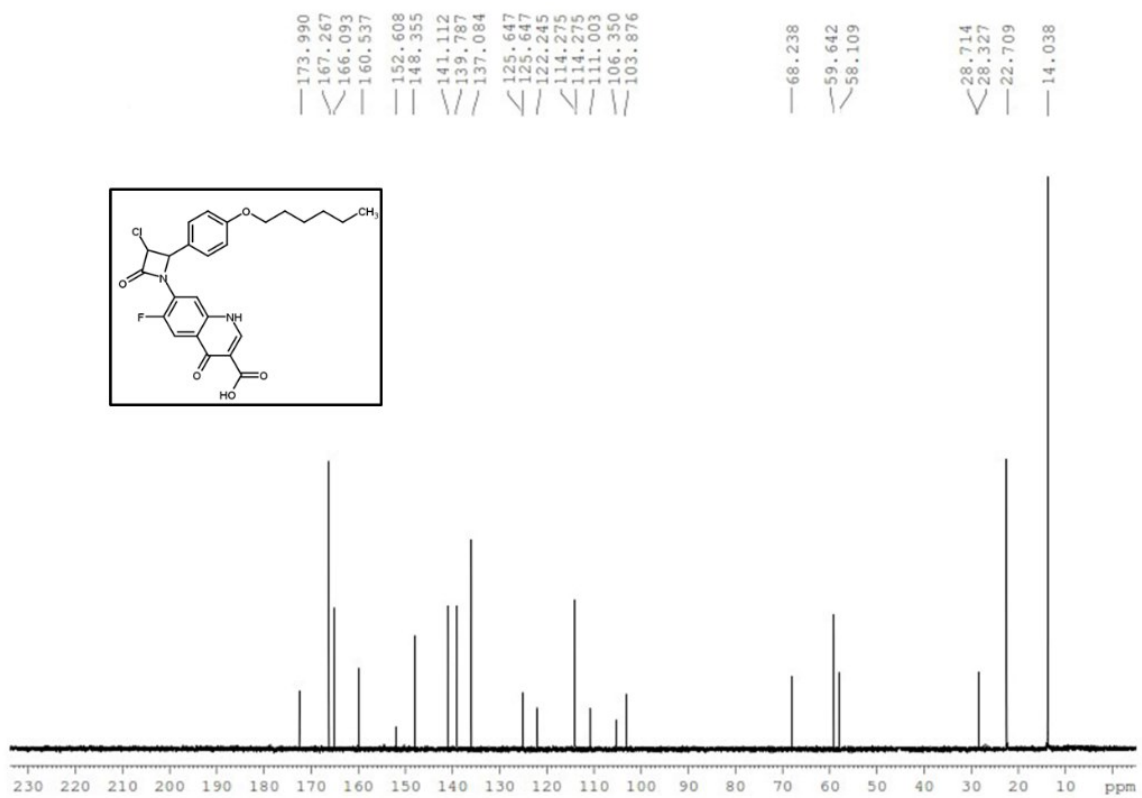

<sup>13</sup>C NMR spectrum of 7-{3-chloro-2-[4-(hexyloxy)phenyl]-4-oxoazetidin-1-yl]-6-fluoro-4-oxo-1,4-dihydroquinoline-3-carboxylic acid (FQ-49).

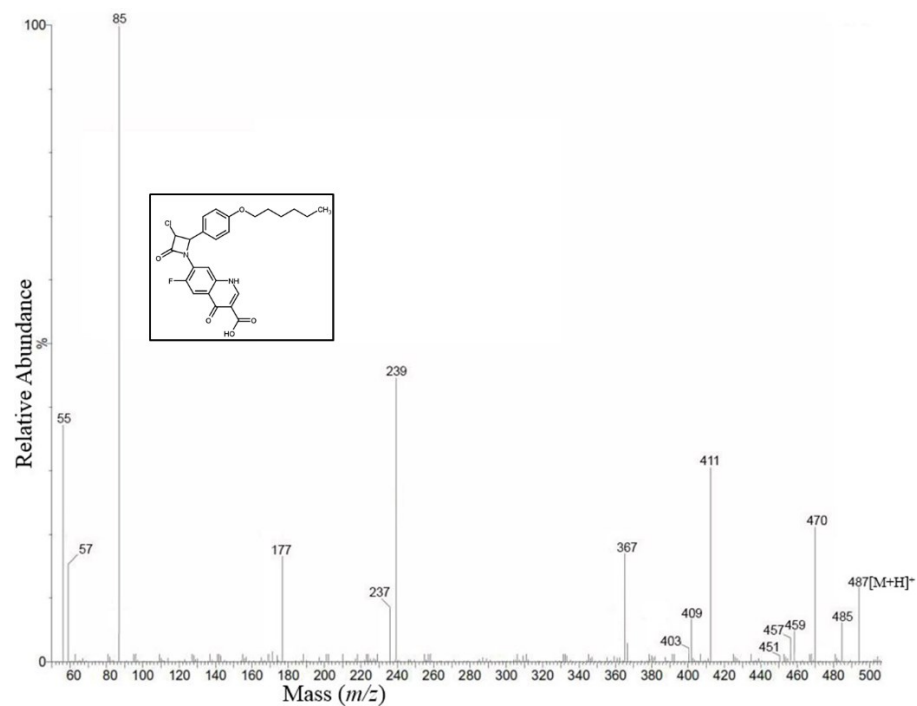

Mass spectrum of 7-{3-chloro-2-[4-(hexyloxy)phenyl]-4-oxoazetidin-1-yl}-6-fluoro-4-oxo-1,4-dihydroquinoline-3-carboxylic acid (FQ-49).

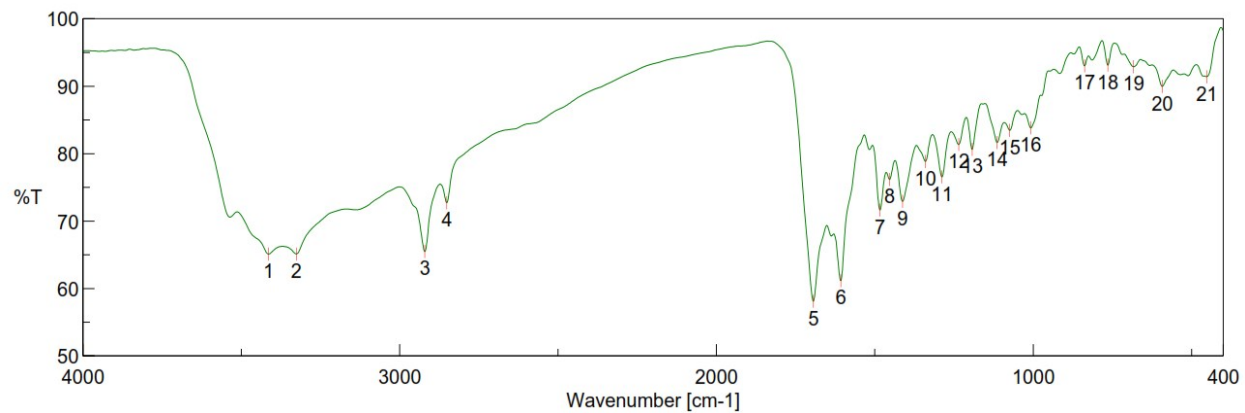

FT-IR spectrum of 7-{3-chloro-2-oxo-4-[4-(pentyloxy)phenyl]azetidin-1-yl}-6-fluoro-4-oxo-1,4-dihydroquinoline-3-carboxylic acid (FQ-70).

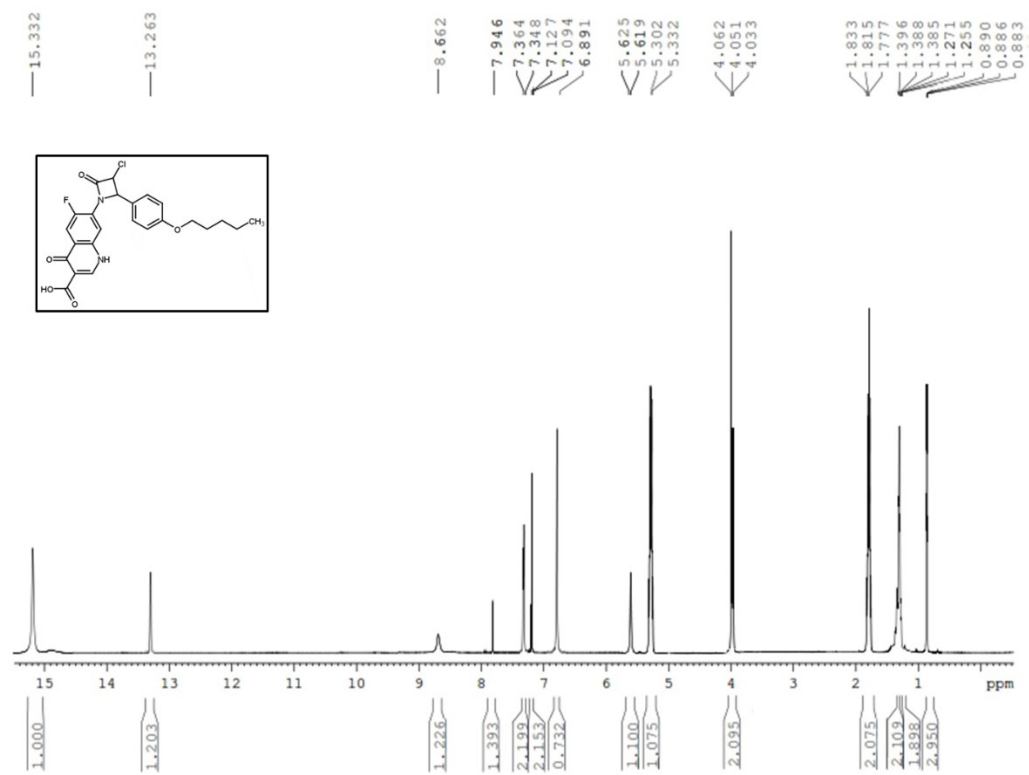

<sup>1</sup>H spectrum of 7-{3-chloro-2-oxo-4-[4-(pentyloxy)phenyl]azetidin-1-yl}-6-fluoro-4-oxo-1,4-dihydroquinoline-3-carboxylic acid (FQ-70).

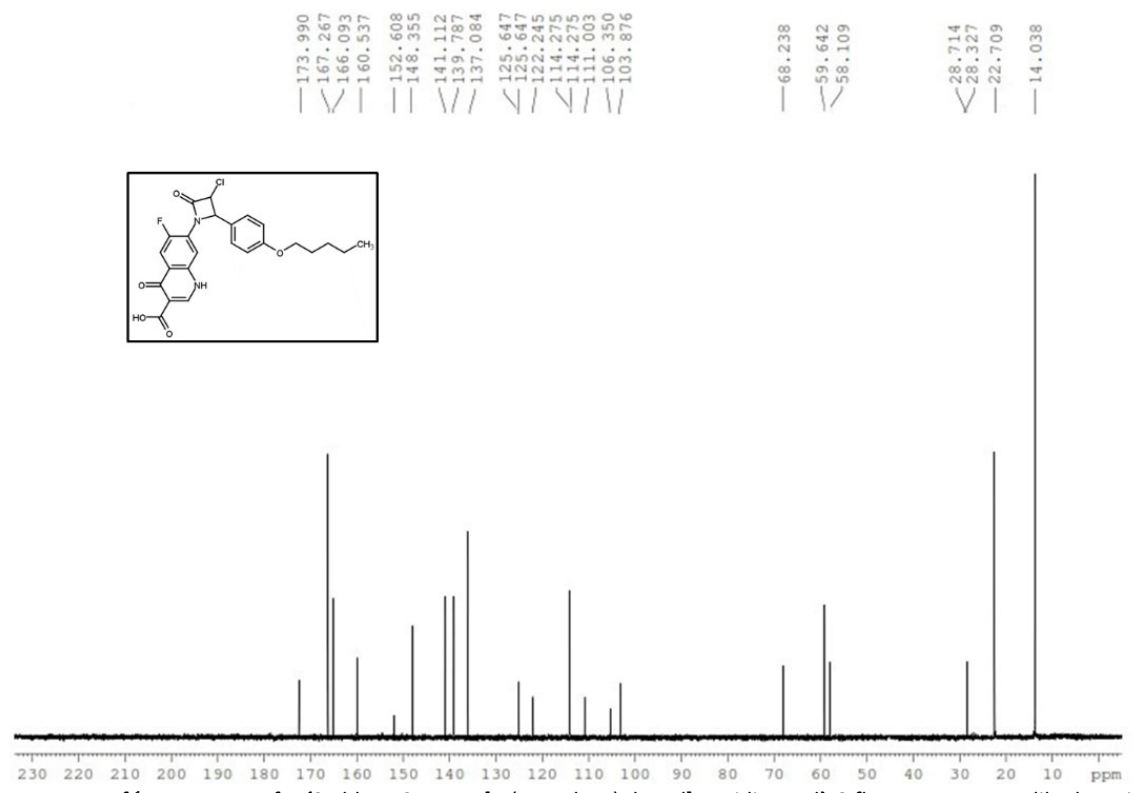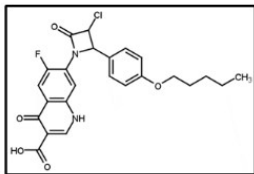

<sup>13</sup>C NMR spectrum of <sup>1</sup>H spectrum of 7-{3-chloro-2-oxo-4-[4-(pentyloxy)phenyl]azetidin-1-yl}-6-fluoro-4-oxo-1,4-dihydroquinoline-3-carboxylic acid (FQ-70).

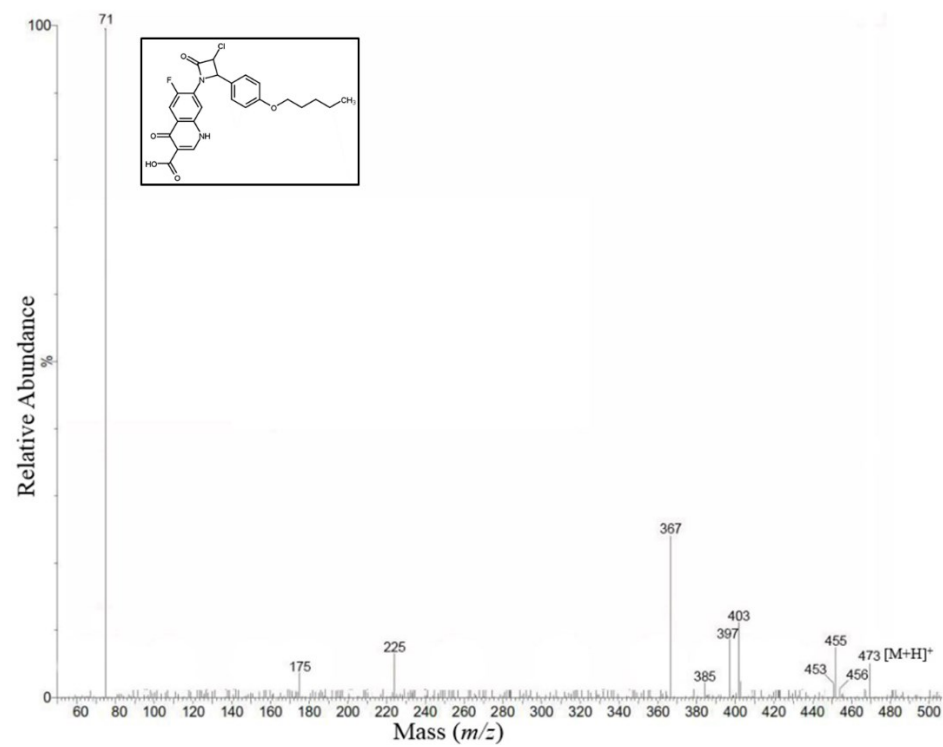

Mass spectrum of <sup>1</sup>H spectrum of 7-{3-chloro-2-oxo-4-[4-(pentyloxy)phenyl]azetidin-1-yl}-6-fluoro-4-oxo-1,4-dihydroquinoline-3-carboxylic acid (FQ-70).

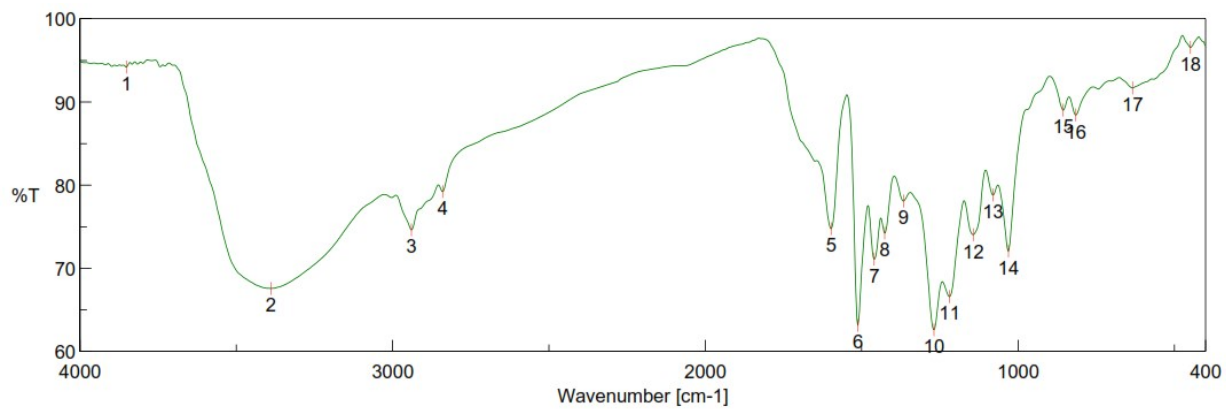



FT-IR spectrum of 7-{2-[4-(benzyloxy)phenyl]-4-oxo-1,3-thiazolidin-3-yl}-6-fluoro-4-oxo-1,4-dihydroquinoline-3-carboxylic acid (FQ-131).

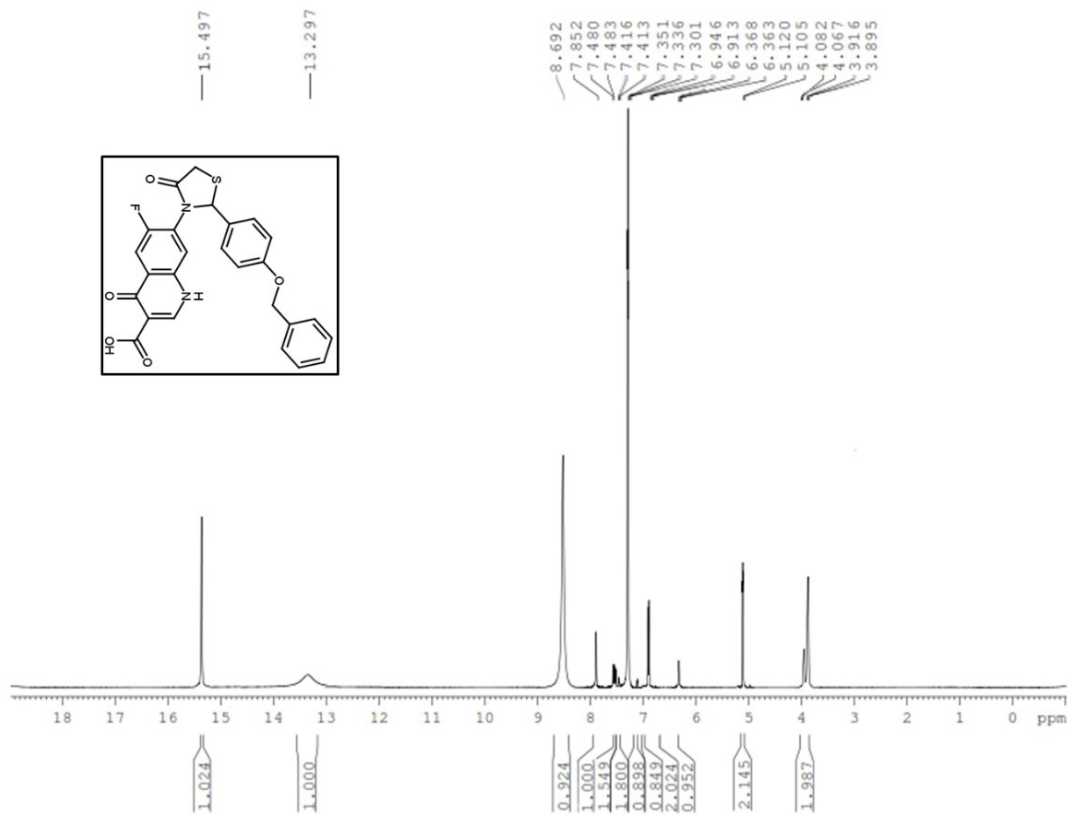

<sup>1</sup>H NMR spectrum of 7-{2-[4-(benzyloxy)phenyl]-4-oxo-1,3-thiazolidin-3-yl}-6-fluoro-4-oxo-1,4-dihydroquinoline-3-carboxylic acid (FQ-131).

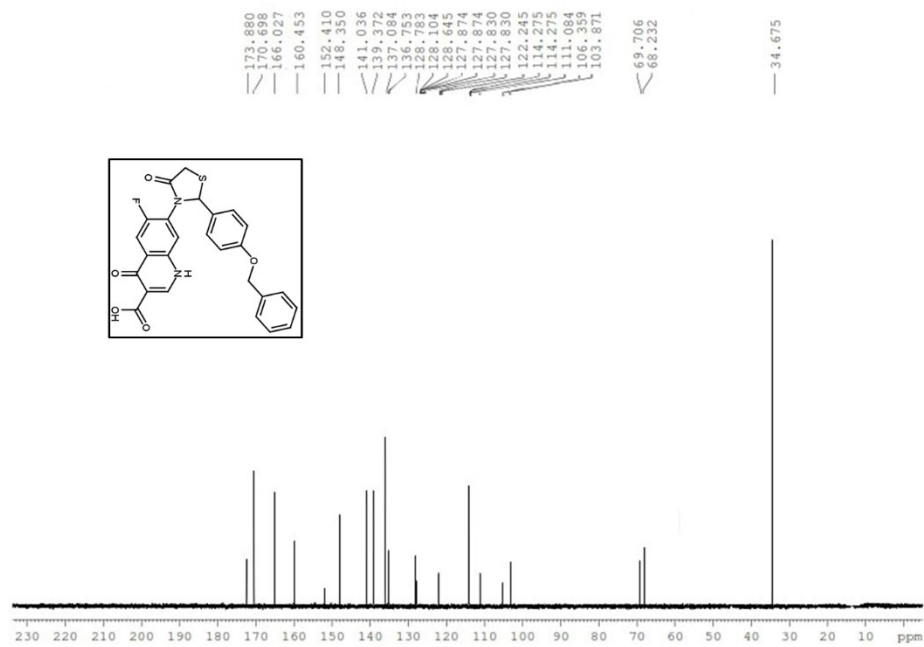

<sup>13</sup>C NMR spectrum of 7-[2-[4-(benzyloxy)phenyl]-4-oxo-1,3-thiazolidin-3-yl]-6-fluoro-4-oxo-1,4-dihydroquinoline-3-carboxylic acid (FQ-131).

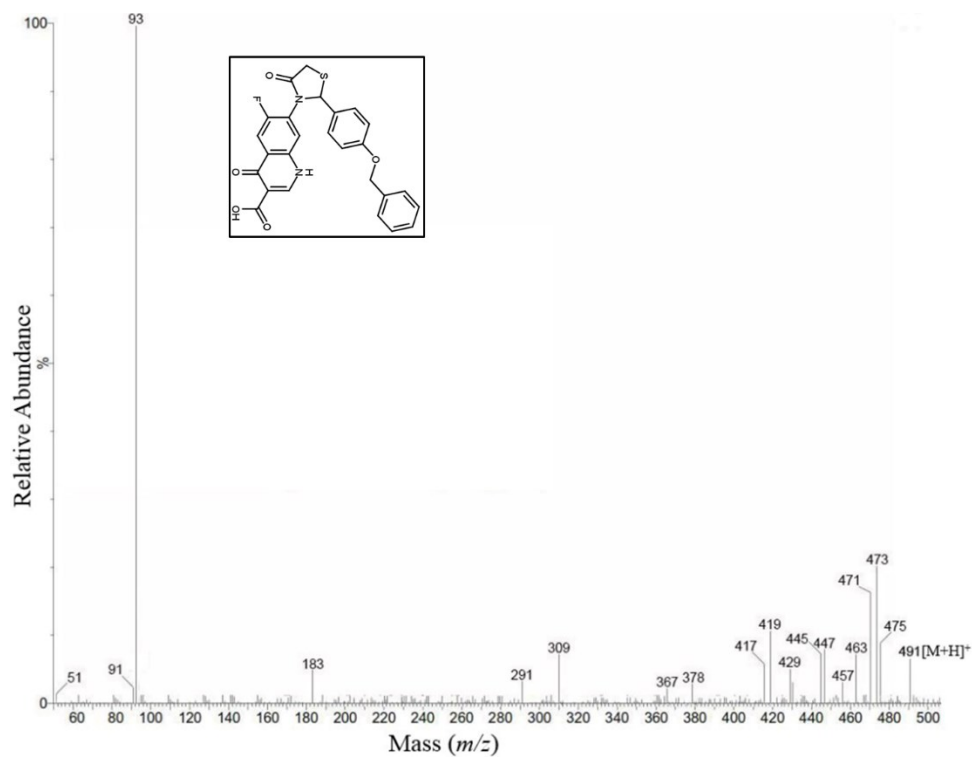

Mass spectrum of 7-[2-[4-(benzyloxy)phenyl]-4-oxo-1,3-thiazolidin-3-yl]-6-fluoro-4-oxo-1,4-dihydroquinoline-3-carboxylic acid (FQ-131).

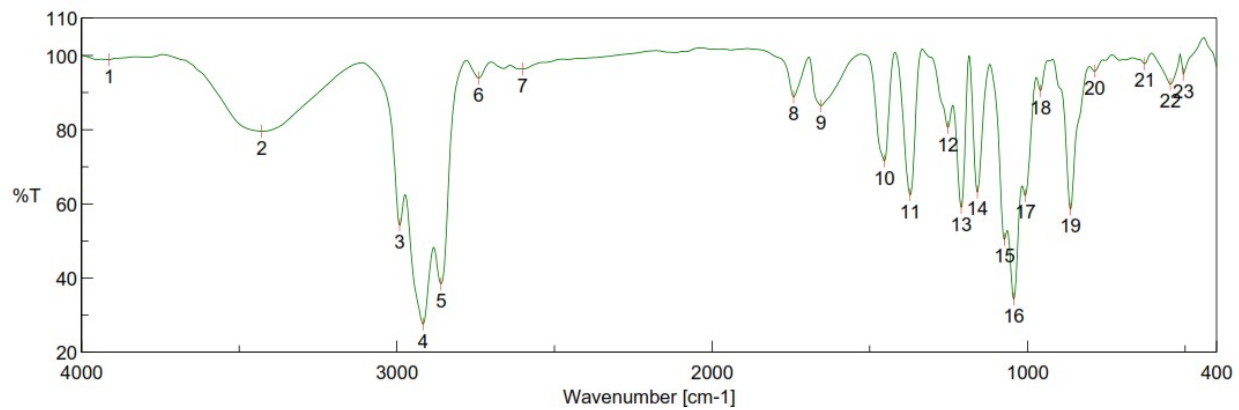

FT-IR spectrum of 7-[2-(4-butoxyphenyl)-4-oxo-1,3-thiazolidin-3-yl]-6-fluoro-4-oxo-1,4-dihydroquinoline-3-carboxylic acid (FQ-132).

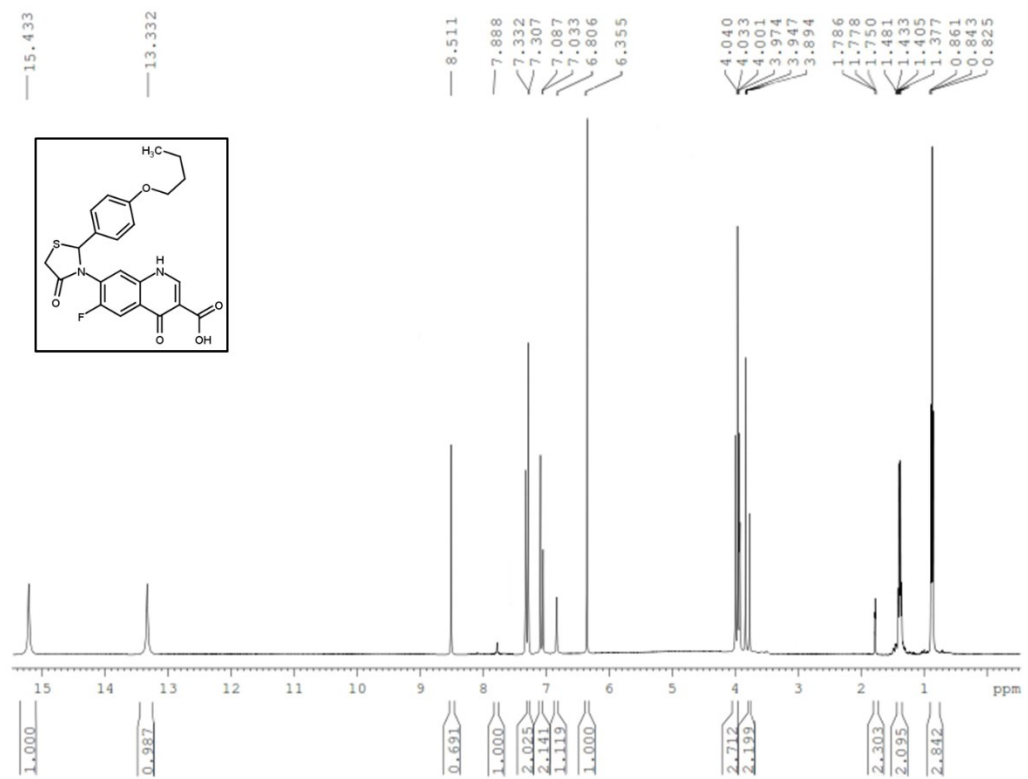

<sup>1</sup>H NMR spectrum of 7-[2-(4-butoxyphenyl)-4-oxo-1,3-thiazolidin-3-yl]-6-fluoro-4-oxo-1,4-dihydroquinoline-3-carboxylic acid (FQ-132).

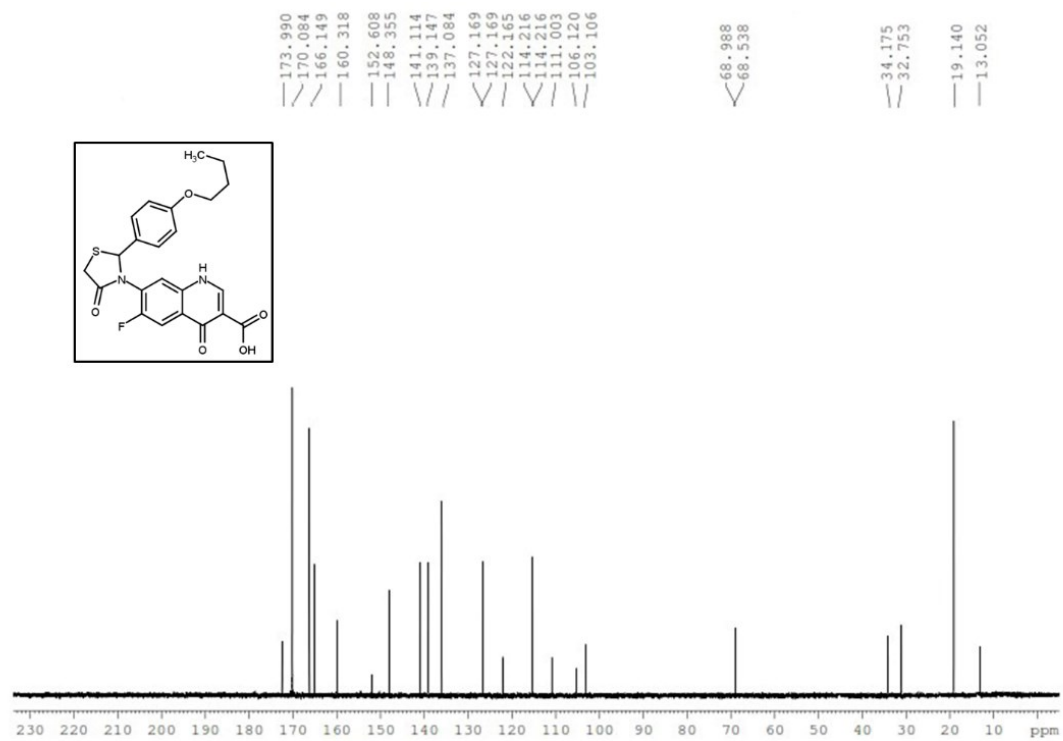

<sup>13</sup>C spectrum of 7-[2-(4-butoxyphenyl)-4-oxo-1,3-thiazolidin-3-yl]-6-fluoro-4-oxo-1,4-dihydroquinoline-3-carboxylic acid (FQ-132).

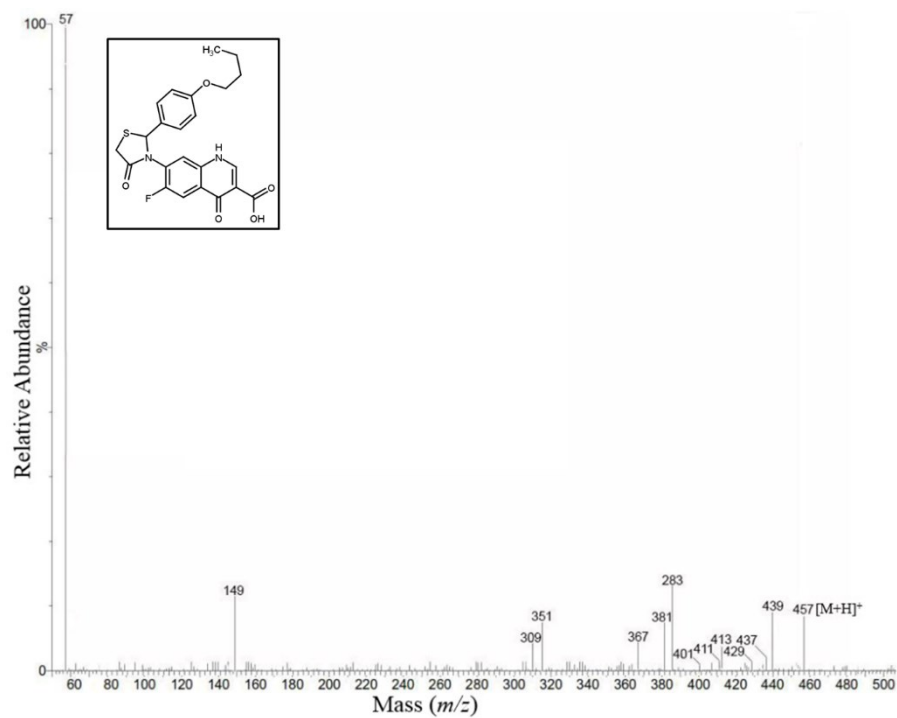

Mass spectrum of 7-[2-(4-butoxyphenyl)-4-oxo-1,3-thiazolidin-3-yl]-6-fluoro-4-oxo-1,4-dihydroquinoline-3-carboxylic acid (FQ-132).  
**Peak Find - repaglidine standard**

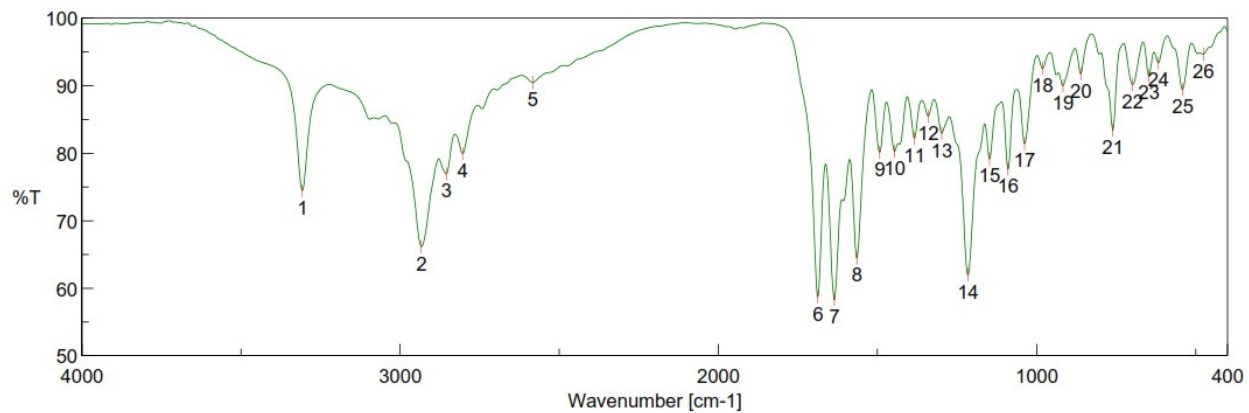

FT-IR spectrum of 7-[2-(3,4-dihydroxyphenyl)-4-oxo-1,3-thiazolidin-3-yl]-6-fluoro-4-oxo-1,4-dihydroquinoline-3-carboxylic acid (FQ-137).

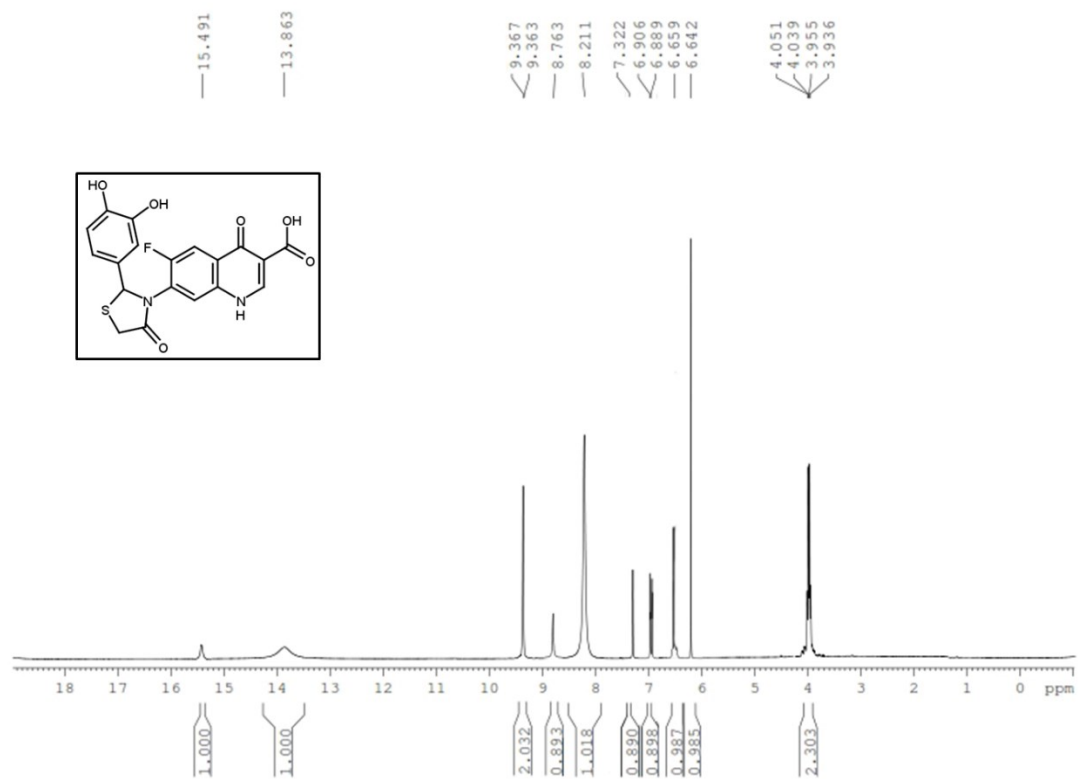

<sup>1</sup>H NMR spectrum of 7-[2-(3,4-dihydroxyphenyl)-4-oxo-1,3-thiazolidin-3-yl]-6-fluoro-4-oxo-1,4-dihydroquinoline-3-carboxylic acid (FQ-137).

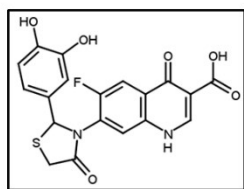

173.990  
170.104  
166.023  
152.505  
148.900  
146.642  
145.127  
141.098  
137.220  
136.958  
127.082  
122.245  
113.992  
111.025  
111.025  
106.079  
103.613

68.071

34.054

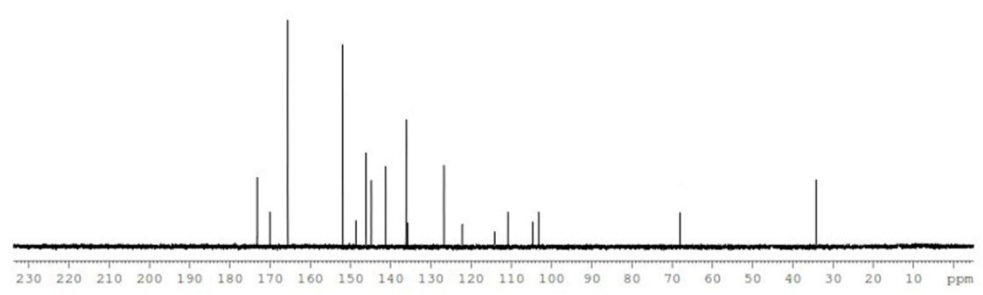

<sup>13</sup>C spectrum of 7-[2-(3,4-dihydroxyphenyl)-4-oxo-1,3-thiazolidin-3-yl]-6-fluoro-4-oxo-1,4-dihydroquinoline-3-carboxylic acid (FQ-137).



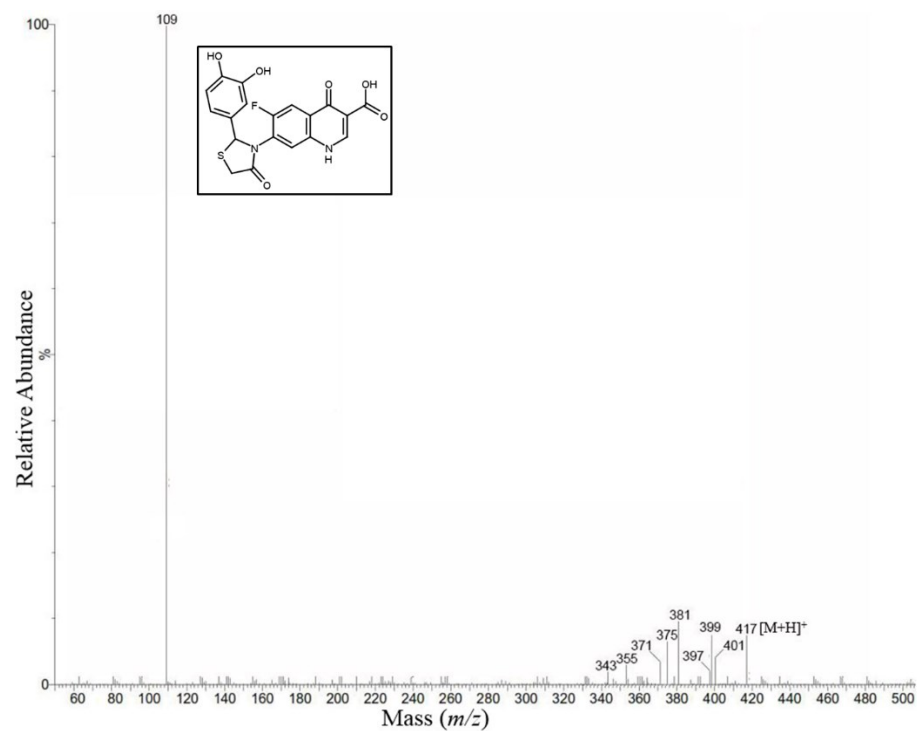

Mass spectrum of 7-[2-(3,4-dihydroxyphenyl)-4-oxo-1,3-thiazolidin-3-yl]-6-fluoro-4-oxo-1,4-dihydroquinoline-3-carboxylic acid (FQ-137).

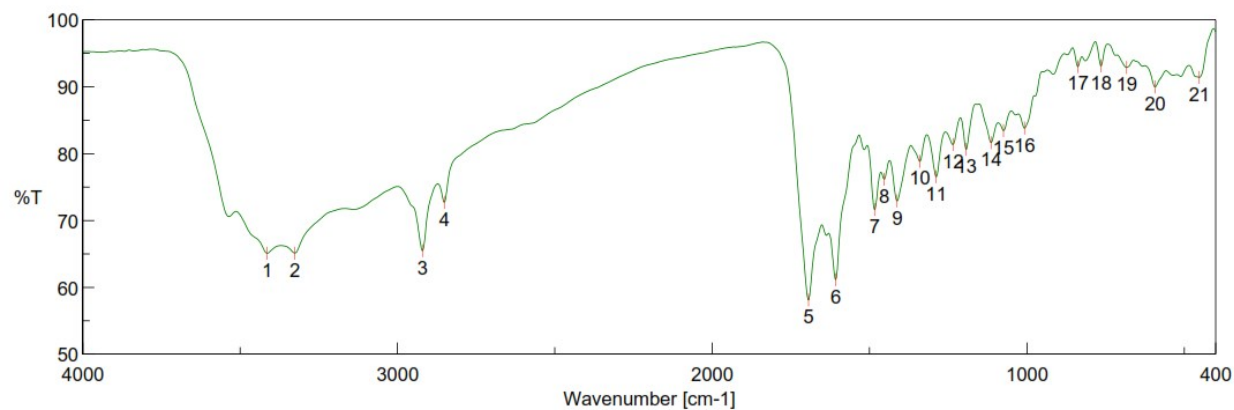

FT-IR spectrum of 7-[2-(3-ethoxy-4-hydroxyphenyl)-4-oxo-1,3-thiazolidin-3-yl]-6-fluoro-4-oxo-1,4-dihydroquinoline-3-carboxylic acid (FQ-147).

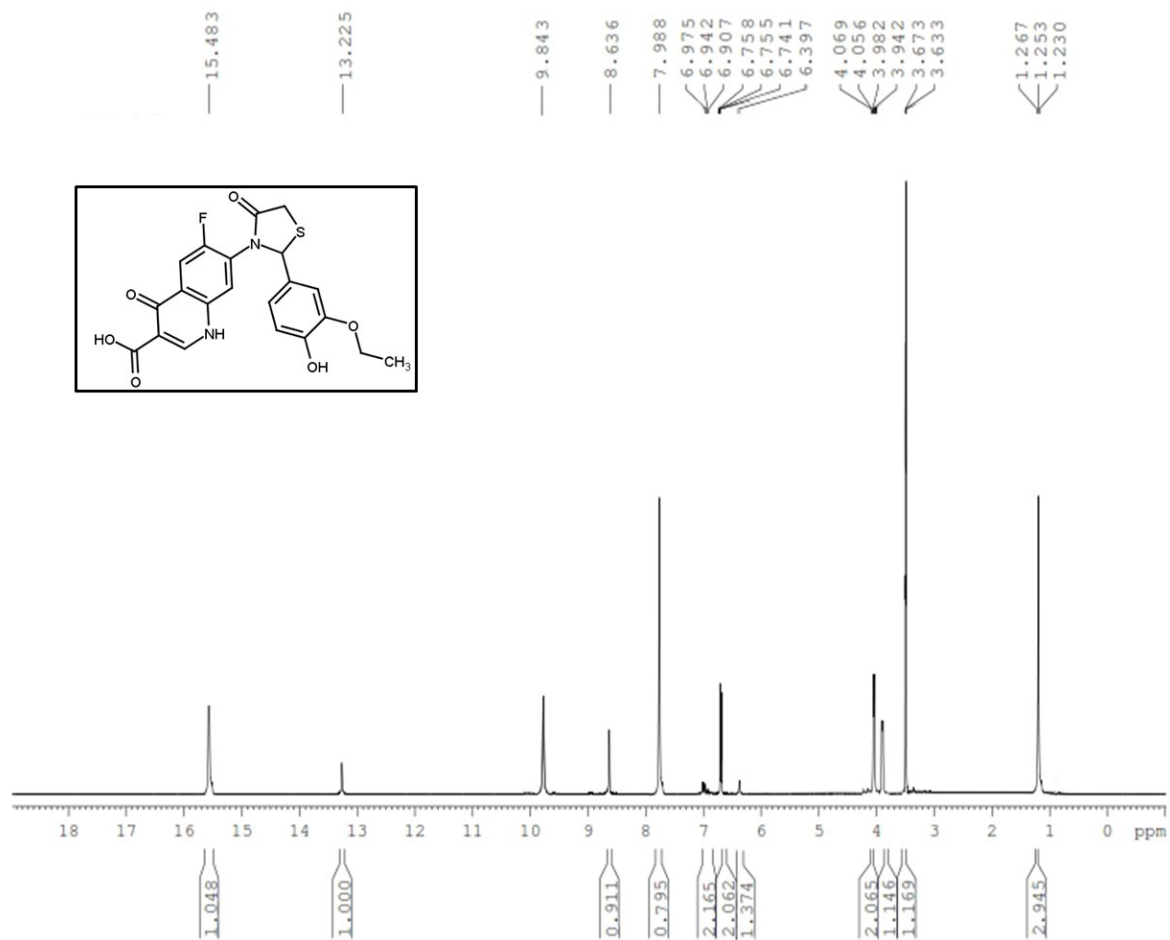

<sup>1</sup>H NMR spectrum of 7-[2-(3-ethoxy-4-hydroxyphenyl)-4-oxo-1,3-thiazolidin-3-yl]-6-fluoro-4-oxo-1,4-dihydroquinoline-3-carboxylic acid (FQ-147).

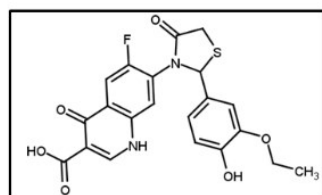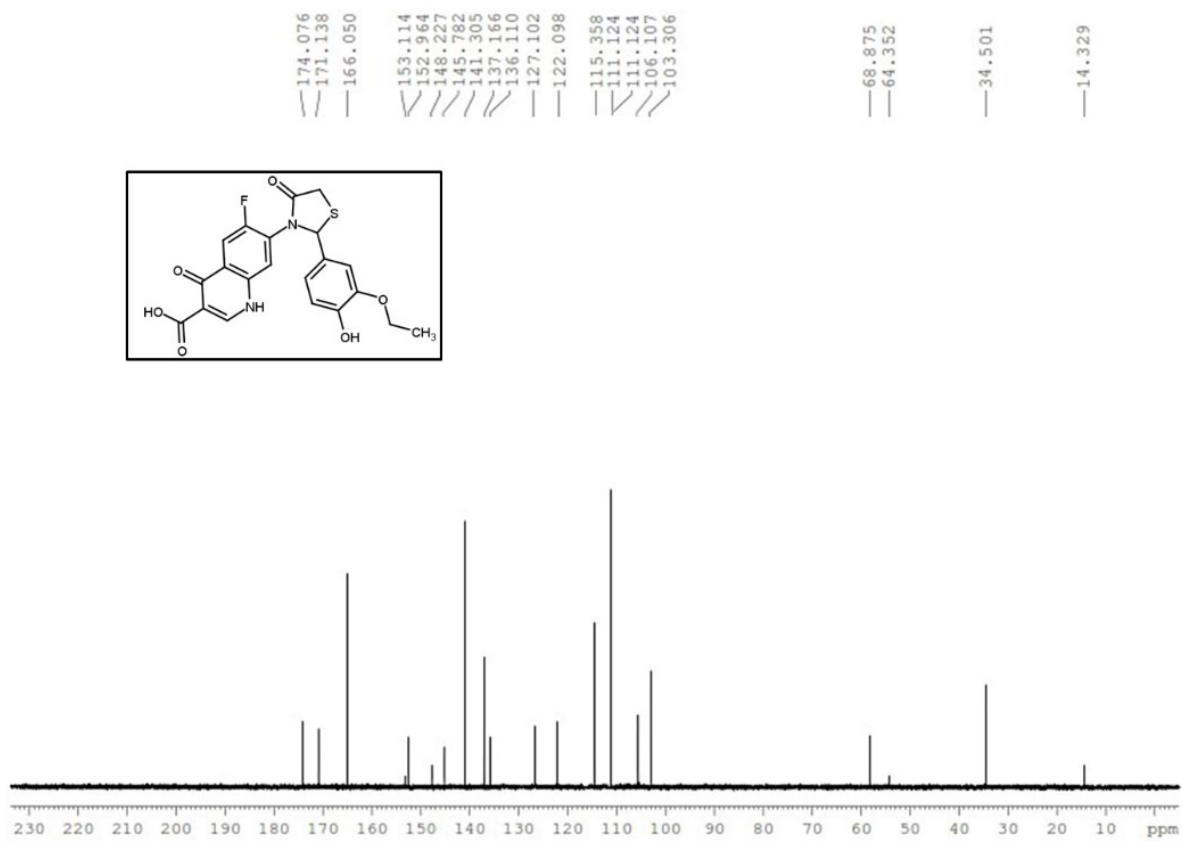

<sup>13</sup>C NMR spectrum of 7-[2-(3-ethoxy-4-hydroxyphenyl)-4-oxo-1,3-thiazolidin-3-yl]-6-fluoro-4-oxo-1,4-dihydroquinoline-3-carboxylic acid (FQ-147).

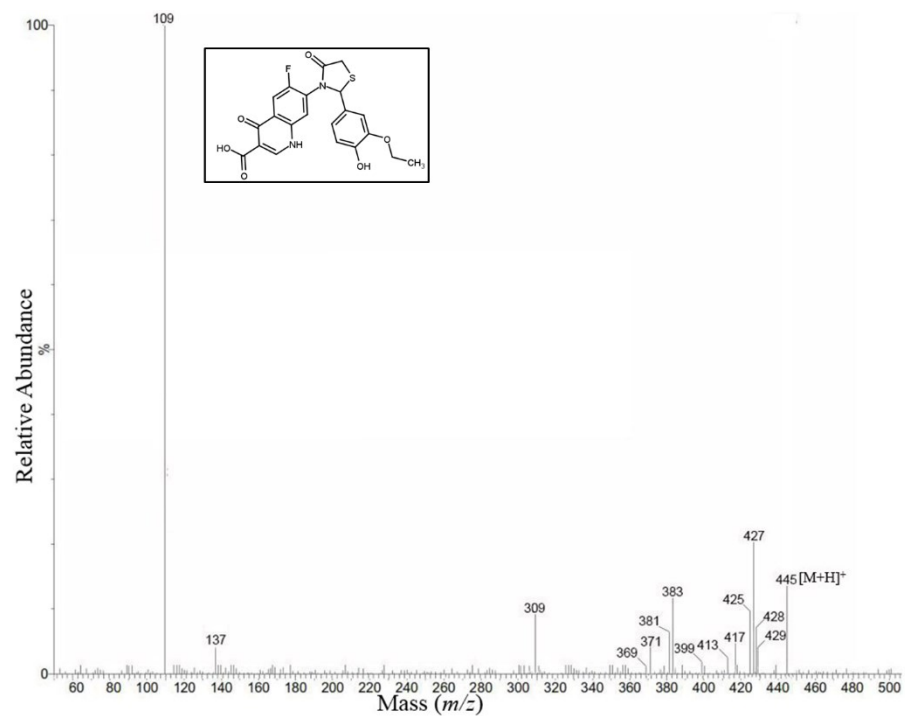

Mass spectrum of 7-[2-(3-ethoxy-4-hydroxyphenyl)-4-oxo-1,3-thiazolidin-3-yl]-6-fluoro-4-oxo-1,4-dihydroquinoline-3-carboxylic acid (FQ-147).

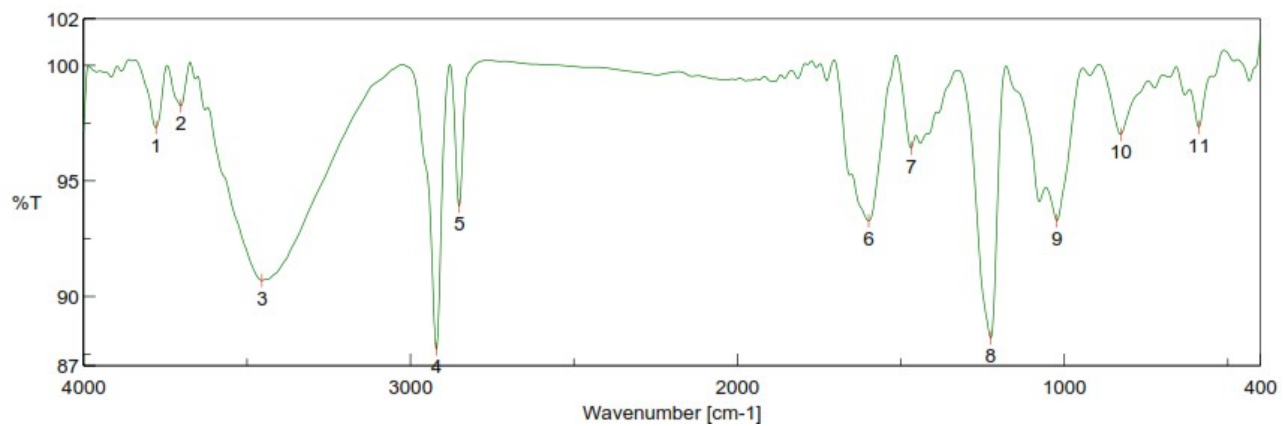

FT-IR spectrum of 6-fluoro-7-[2-[4-(hexyloxy)phenyl]-4-oxo-1,3-thiazolidin-3-yl]-4-oxo-1,4-dihydroquinoline-3-carboxylic acid (FQ-151).

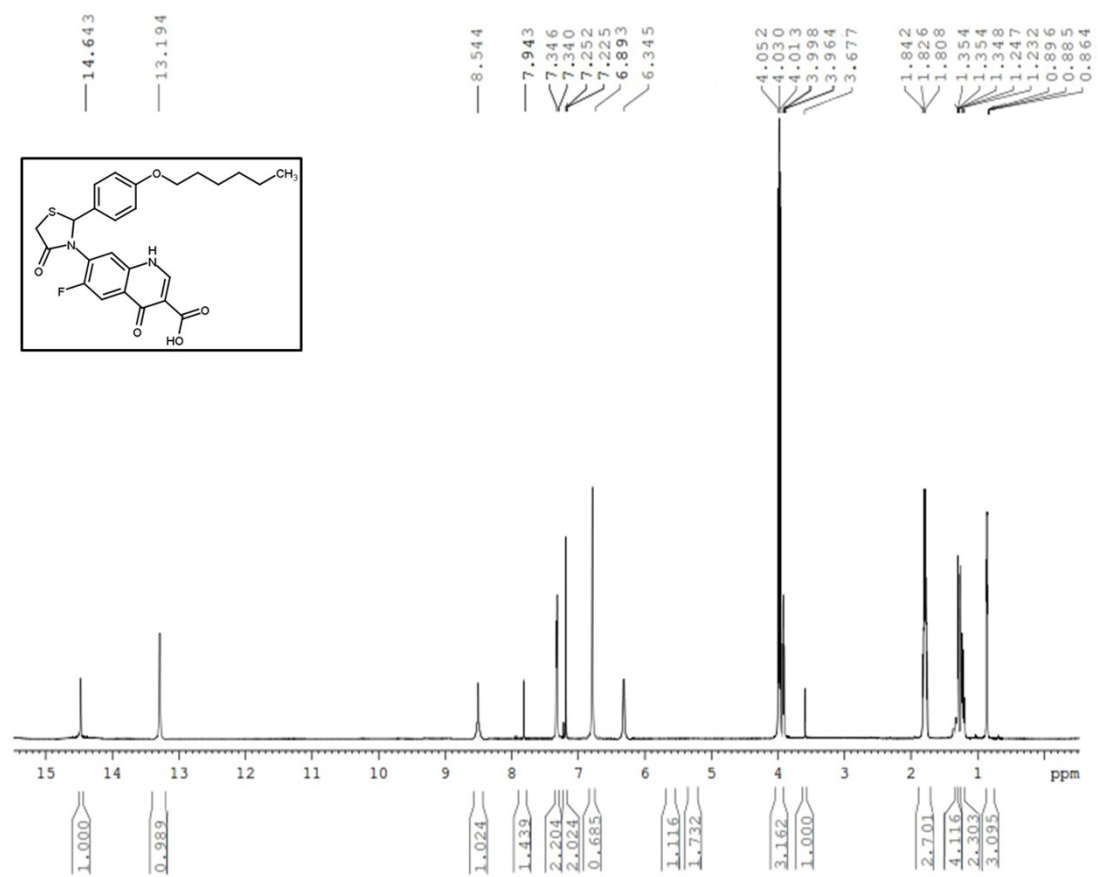

<sup>1</sup>H NMR spectrum of 6-fluoro-7-{2-[4-(hexyloxy)phenyl]-4-oxo-1,3-thiazolidin-3-yl}-4-oxo-1,4-dihydroquinoline-3-carboxylic acid (FQ-151).

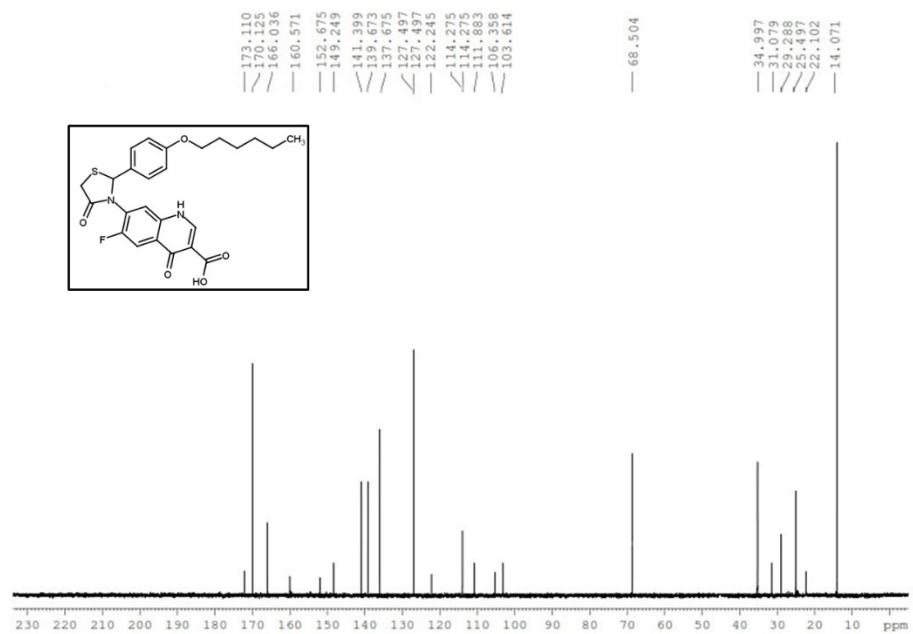

<sup>13</sup>C NMR spectrum of 6-fluoro-7-{2-[4-(hexyloxy)phenyl]-4-oxo-1,3-thiazolidin-3-yl}-4-oxo-1,4-dihydroquinoline-3-carboxylic acid (FQ-151).

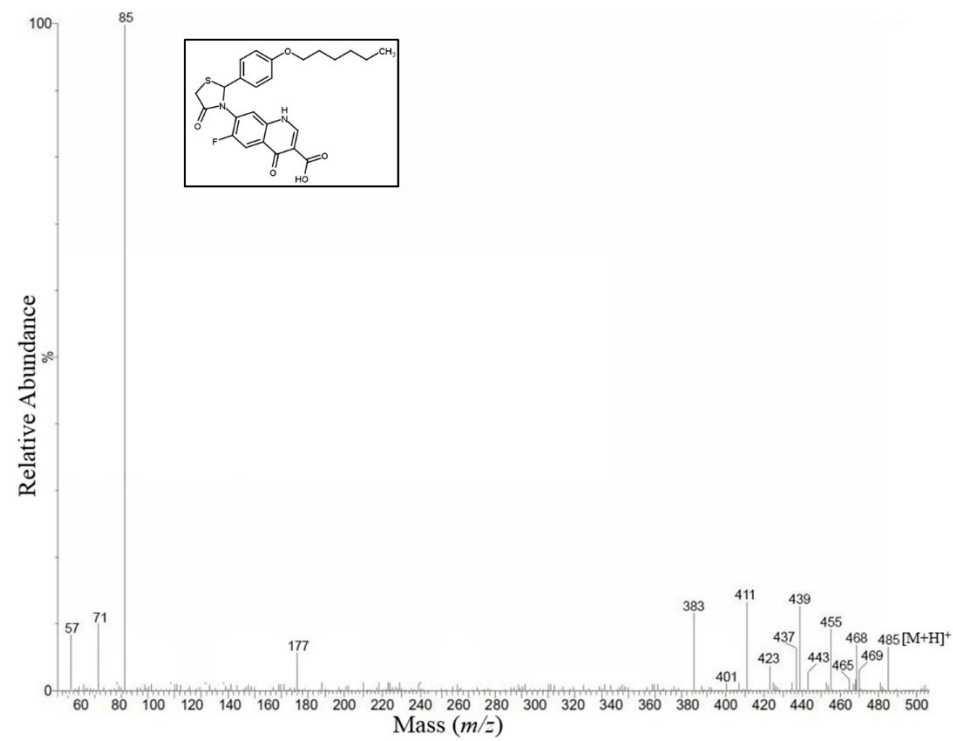

Mass spectrum of 6-fluoro-7-{2-[4-(hexyloxy)phenyl]-4-oxo-1,3-thiazolidin-3-yl}-4-oxo-1,4-dihydroquinoline-3-carboxylic acid (FQ-151).

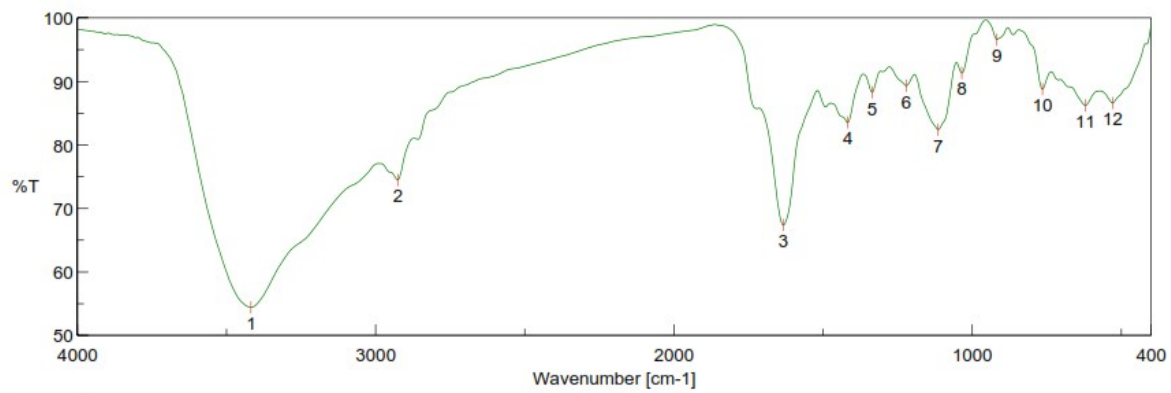

6-fluoro-4-oxo-7-{4-oxo-2-[4-(pentyloxy)phenyl]-1,3-thiazolidin-3-yl}-1,4-dihydroquinoline-3-carboxylic acid (FQ-172).

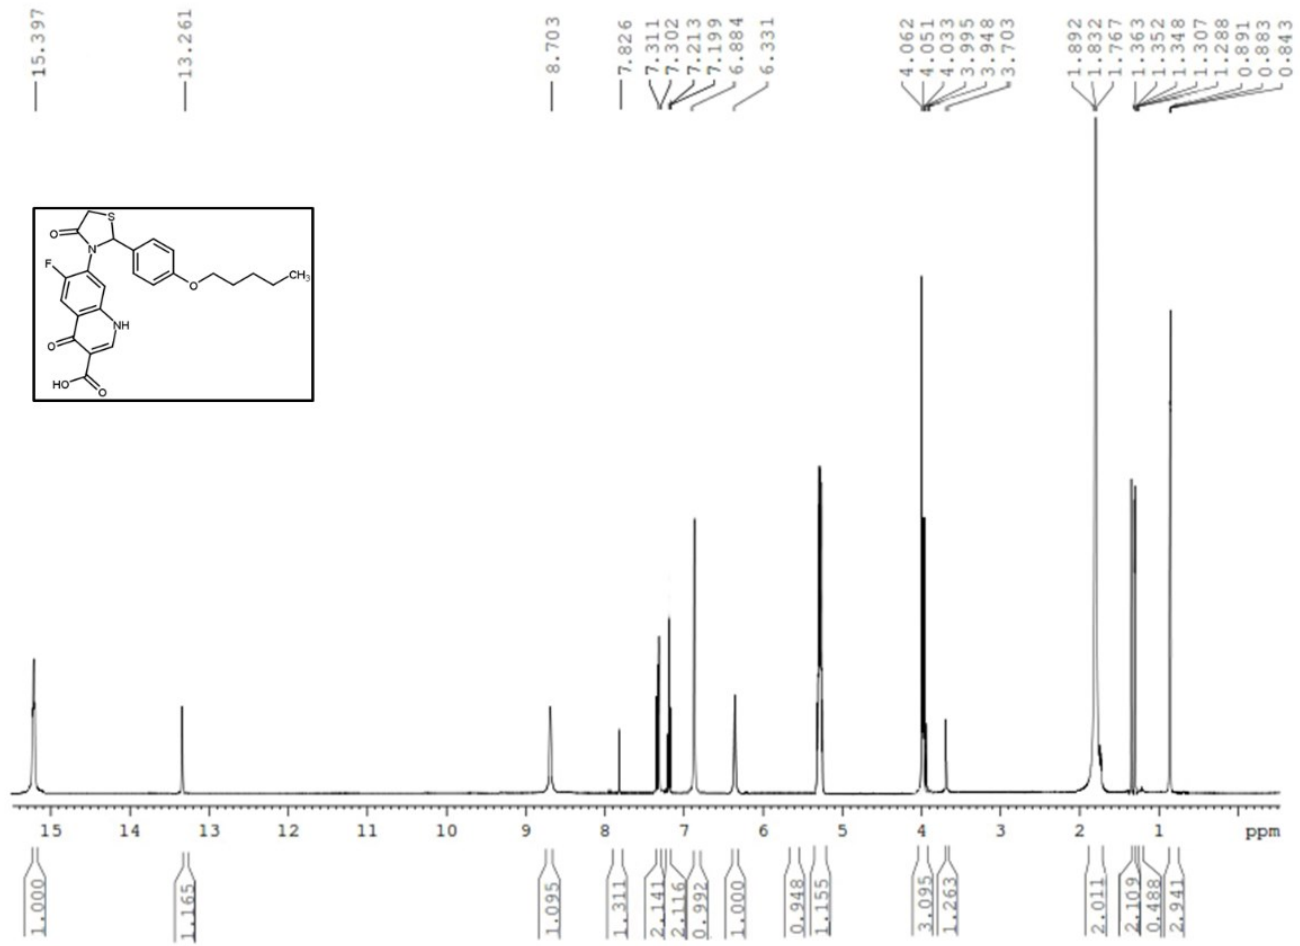

<sup>1</sup>H NMR spectrum of 6-fluoro-4-oxo-7-{4-oxo-2-[4-(pentyloxy)phenyl]-1,3-thiazolidin-3-yl}-1,4-dihydroquinoline-3-carboxylic acid (FQ-172).



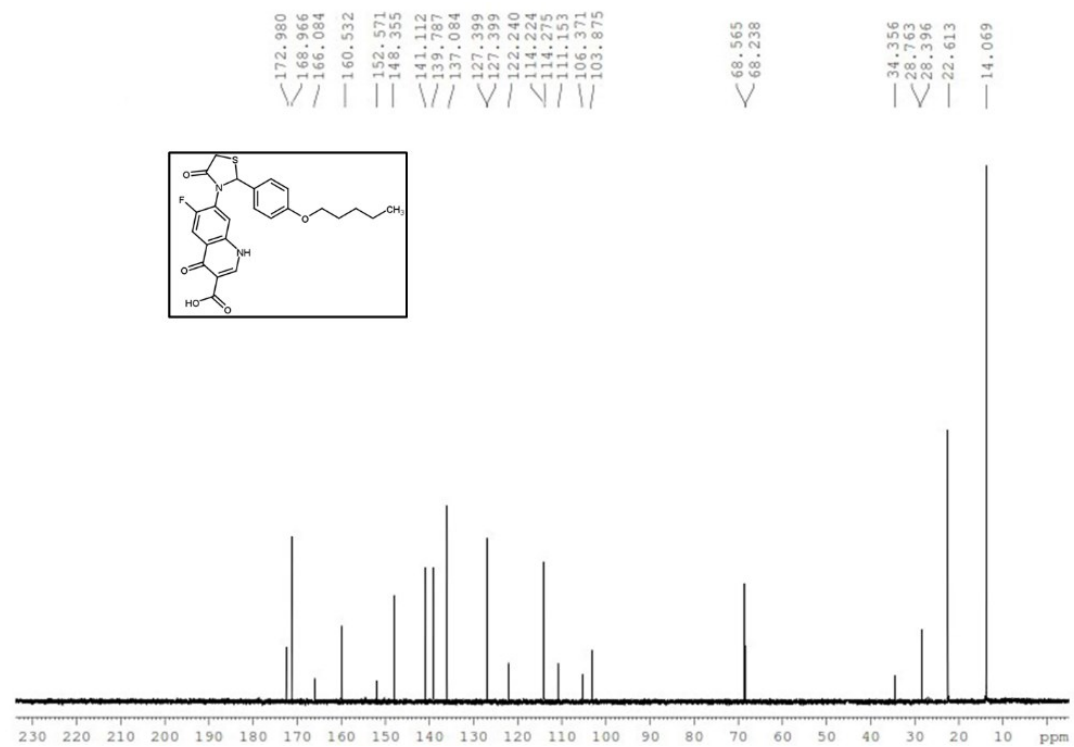

<sup>13</sup>C NMR spectrum of 6-fluoro-4-oxo-7-{4-oxo-2-[4-(pentyloxy)phenyl]-1,3-thiazolidin-3-yl}-1,4-dihydroquinoline-3-carboxylic acid (FQ-172).

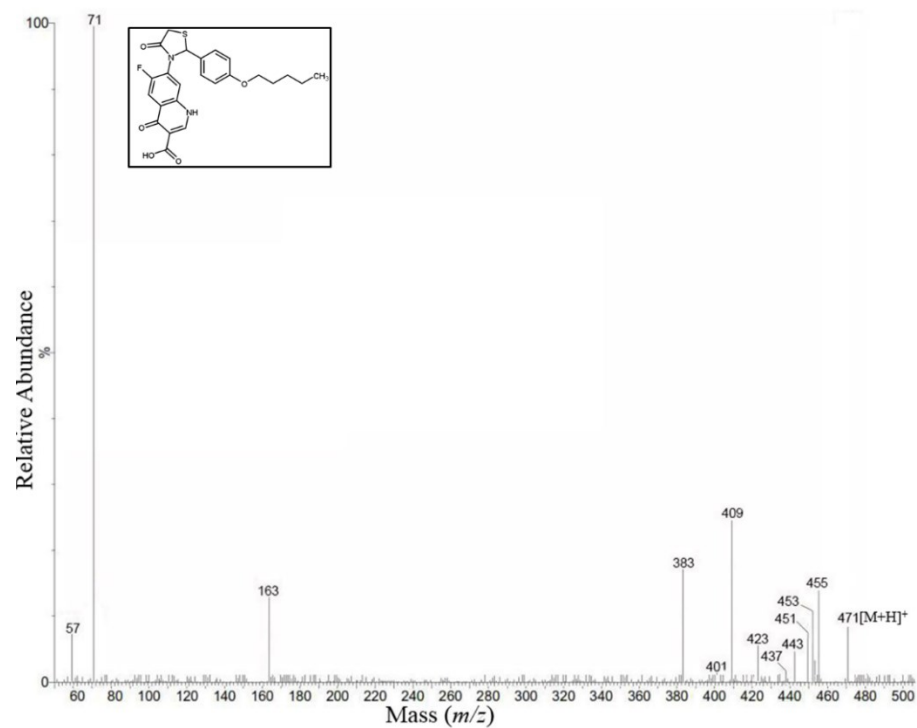

Mass spectrum of 6-fluoro-4-oxo-7-[4-oxo-2-[4-(pentyloxy)phenyl]-1,3-thiazolidin-3-yl]-1,4-dihydroquinoline-3-carboxylic acid (FQ-172).

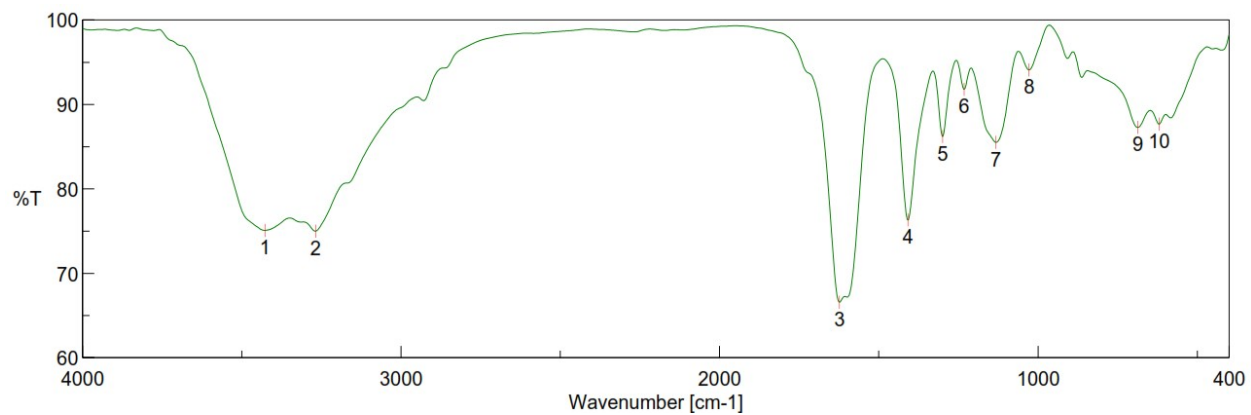

FT-IR spectrum of 6-fluoro-4-oxo-7-[4-oxo-2-(4-propoxyphenyl)-1,3-thiazolidin-3-yl]-1,4-dihydroquinoline-3-carboxylic acid (FQ-177).

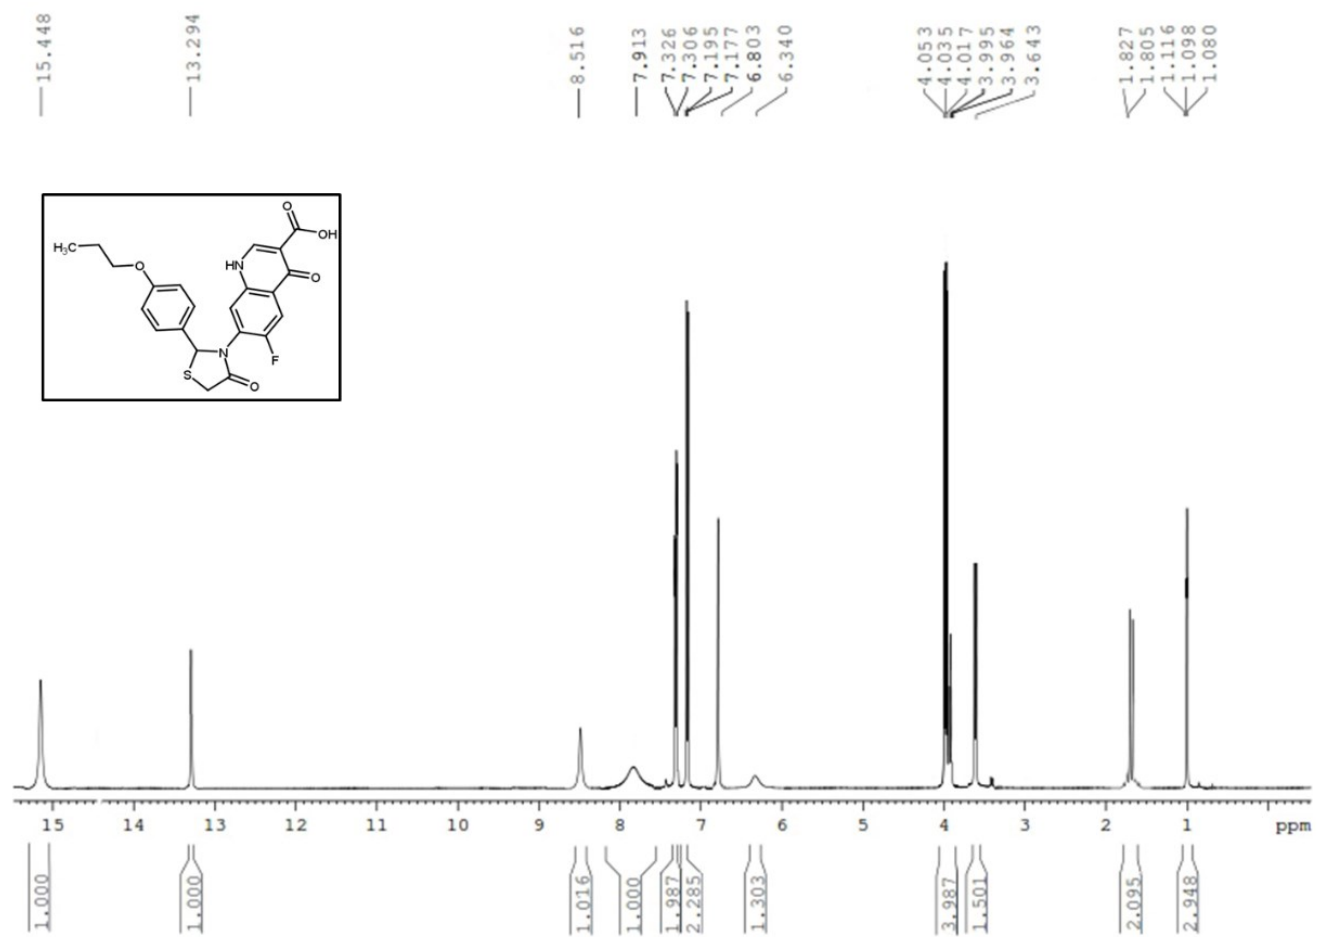

<sup>1</sup>H NMR spectrum of 6-fluoro-4-oxo-7-[4-oxo-2-(4-propoxyphenyl)-1,3-thiazolidine-3-yl]-1,4-dihydroquinoline-3-carboxylic acid (FQ-177).

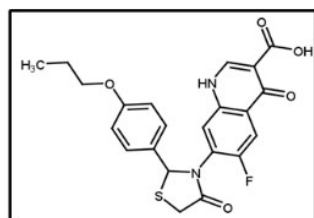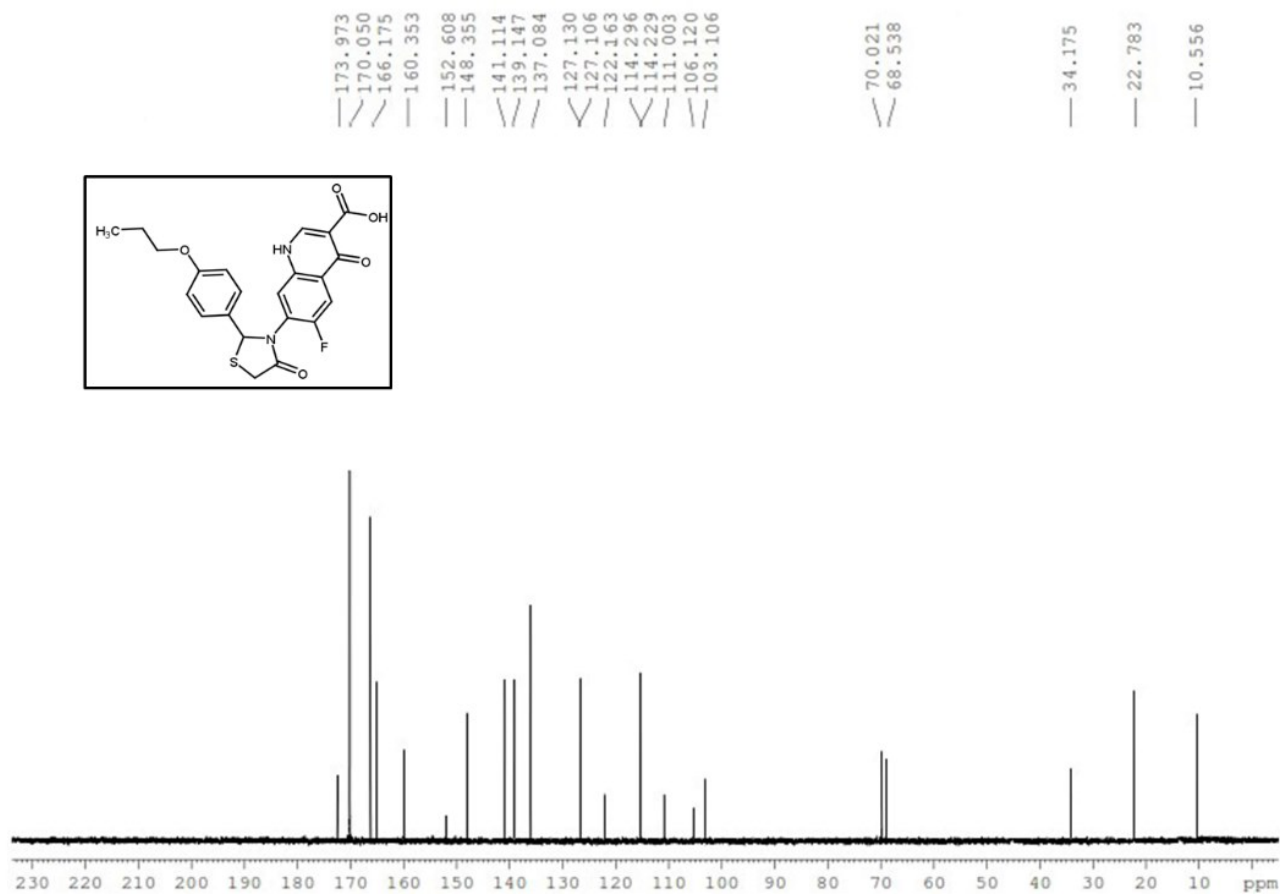

$^{13}\text{C}$  spectrum of 6-fluoro-4-oxo-7-[4-oxo-2-(4-propoxyphenyl)-1,3-thiazolidine-3-yl]-1,4-dihydroquinoline-3-carboxylic acid (FQ-177).

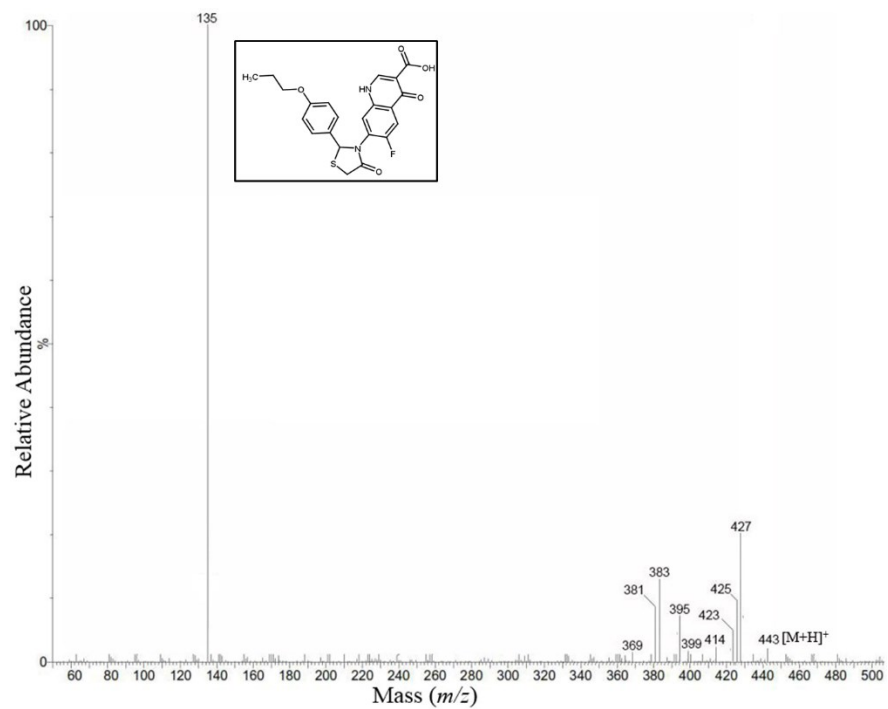

Mass spectrum of 6-fluoro-4-oxo-7-[4-oxo-2-(4-propoxyphenyl)-1,3-thiazolidine-3-yl]-1,4-dihydroquinoline-3-carboxylic acid (FQ-177).

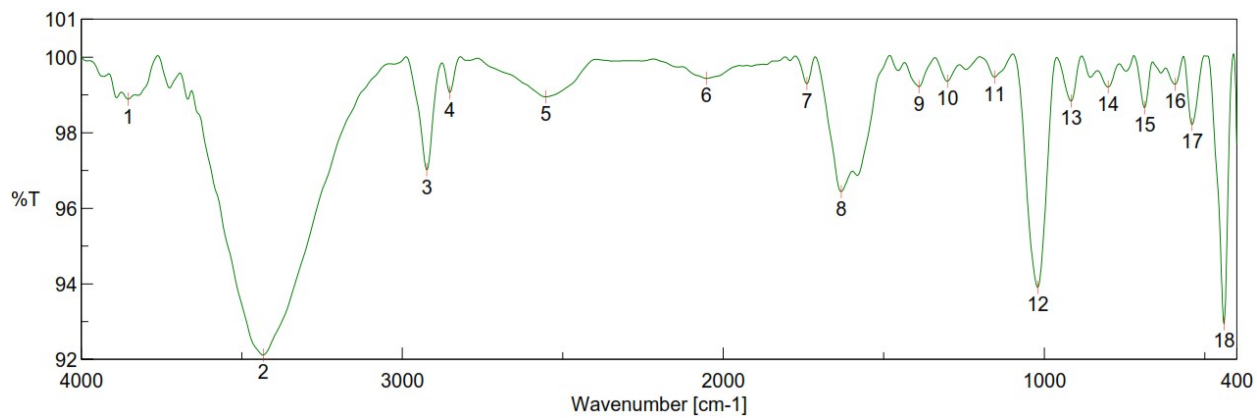

FT-IR 6-fluoro-7-[2-(3-hydroxyphenyl)-4-oxo-1,3-thiazolidin-3-yl]-4-oxo-1,4-dihydroquinoline-3-carboxylic acid (FQ-182).

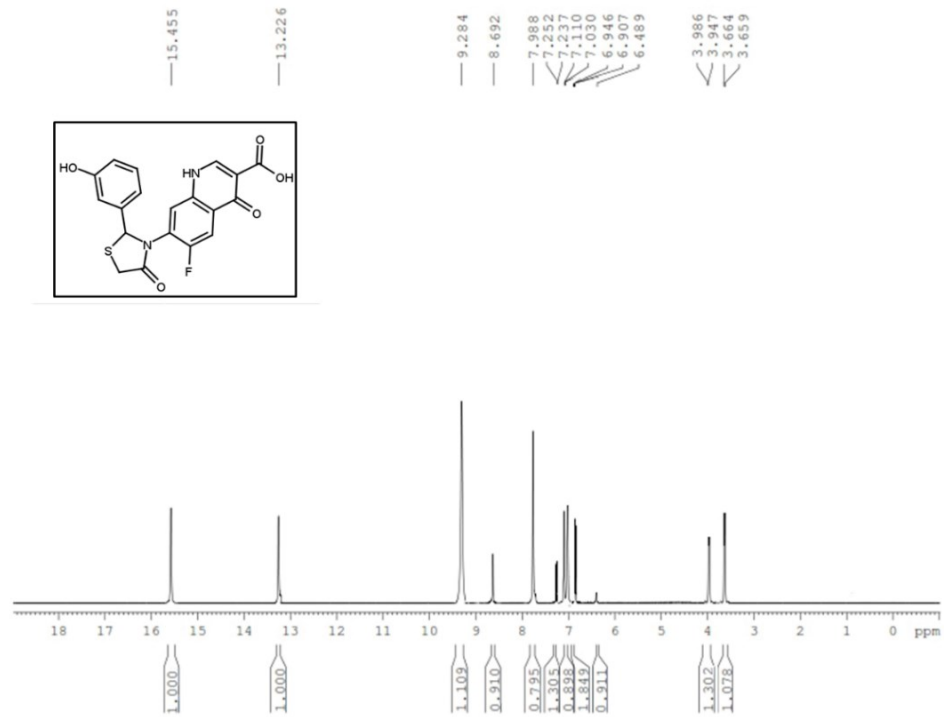

<sup>1</sup>H NMR spectrum of 6-fluoro-7-[2-(3-hydroxyphenyl)-4-oxo-1,3-thiazolidin-3-yl]-4-oxo-1,4-dihydroquinoline-3-carboxylic acid (FQ-182).

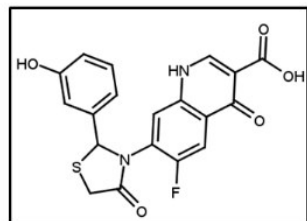

174.076  
171.138  
166.050

153.114  
152.964  
148.227  
141.305  
137.166  
136.110

128.791  
128.102  
122.098  
116.358  
111.124  
111.124  
106.107  
103.306

68.875

34.501

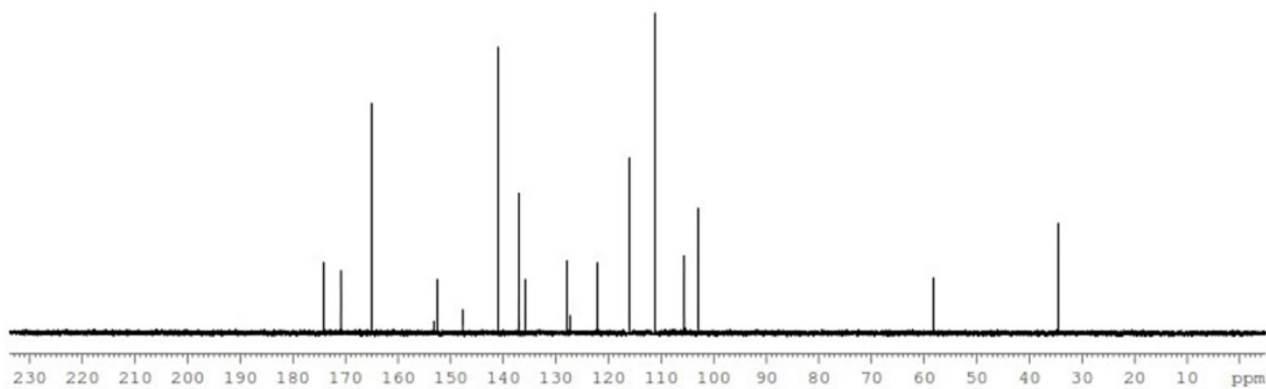

<sup>13</sup>C NMR spectrum of 6-fluoro-7-[2-(3-hydroxyphenyl)-4-oxo-1,3-thiazolidin-3-yl]-4-oxo-1,4-dihydroquinoline-3-carboxylic acid (FQ-182).

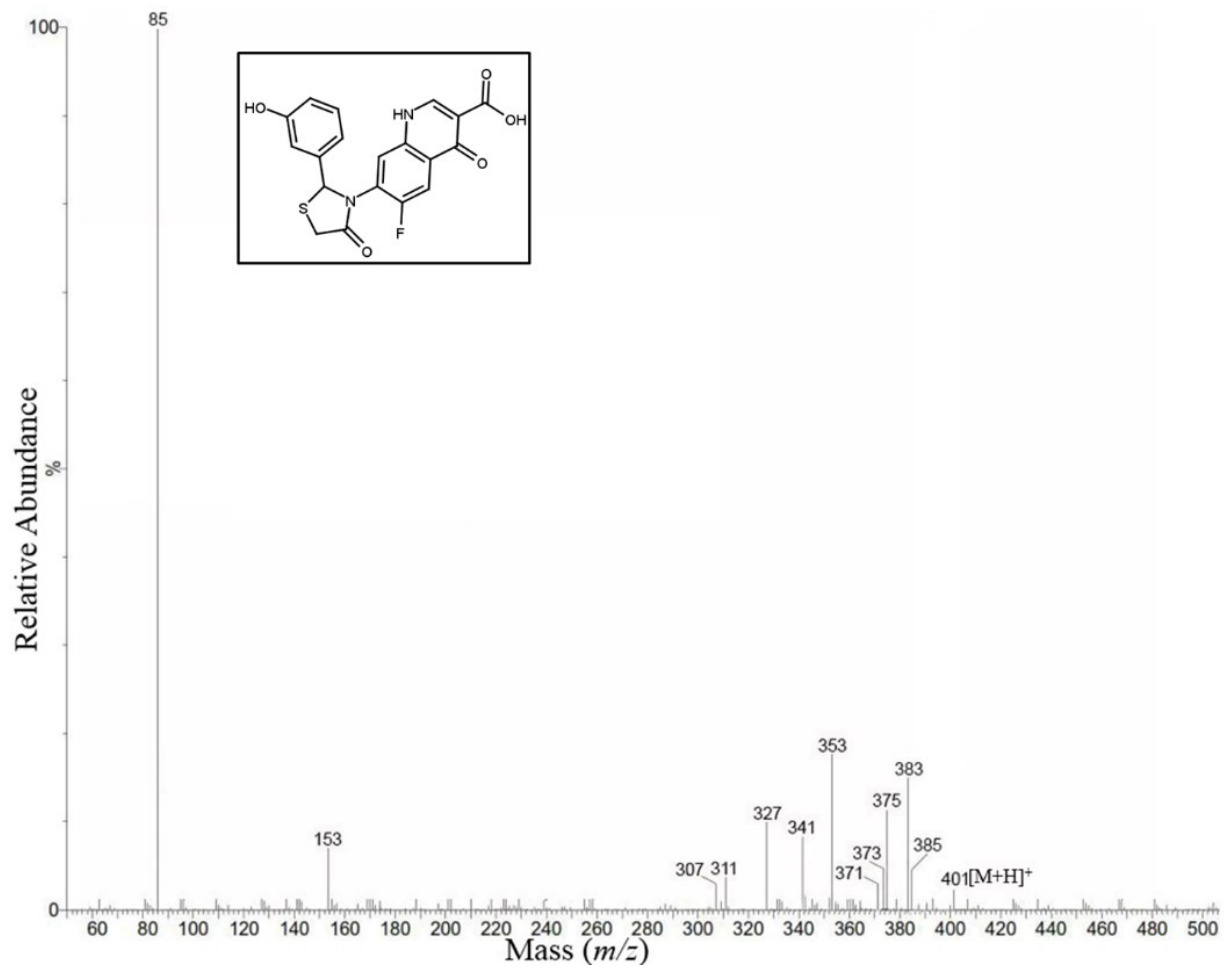

Mass spectrum of 6-fluoro-7-[2-(3-hydroxyphenyl)-4-oxo-1,3-thiazolidin-3-yl]-4-oxo-1,4-dihydroquinoline-3-carboxylic acid (FQ-182).



Fig. S6

```
/translation="MSDLAREITPVNIEEELKSSYL DYAMSVIVGRALPDVRDGLKPV  
HRRVLYAMNVLGNDW NKAYKKSARVVG DVI GKYHPHGDLAVYNTIVRMAQPFSLRYML  
VDGQGNFGSIDGDSAAAMRYTEIRLAKIAHELMADLEKETVDFVDNYDGT EKI PDVMP  
TKIPNLLVNGSSGIAVGMATNIPPHNLTEVINGCLAYIDDEDISIEGLMEHIPGPDFP  
TAAIINGRRGIEEAYRTGRGKVYIRARA EVEVD AKTGRETIIVHEIPYQV NKARLIEK  
IAELVKEKRVEGISALRDESDKDGMRIVIEVKRDAVGEVVLN NLYSQTQLQVSFGINM  
VALHHGQPKIMNLKDIIAAFVRRREV VTRRTIFELRKARDRAHILEALAVLANIDP  
IIEHIRHAPTPAEAKTALVANPWQLGNVAAMLERAGDDAARPEWLEPEFGVRDGLYYL  
TEQQAQAILDLRLQKLTGLEHEKLLDEYKELLDQIAELLRILGSADRLMEVIREE LEL  
VREQFGDKRRT EITANSADINLEDLITQEDVVVTL SHQGYVKYQPLSEYEAQRGGKG  
KSAARIKEEDFIDRLLVANTHDHILCFSSRGRVYSMKVYQLPEATR GARGRP IVNLLP  
LEQDERITAILPVTEFEEGVKVF MATANGTVKKT VLTEFNRLRTAGKVAIKLV DGDDEL  
IGVDLTSGEDEVMLFSAEGKVRFKESSVRAMGCNTTGVRGIRLGEGDKVVS LIVPRG  
DGAILTATQNGYKRTAVA EYPTKSRATKGVISIKVTERNGLVVGAVQVDDCDQIMMI  
TDAGTLVRTRVSEISIVGRNTQGVILIRTAEDENVVGLQRVAEPVDEEDLDTIDGSAA  
EGDDEIAPEVDV DDEPEEE"
```

Fig. S6. The full-length sequence of mtDNA GyrA
